# Supplementary material for: Synthesis of 10b-fluorinated analogues of protubonine A and its 11a-epimer via fluorocyclisation of tryptophan-containing dipeptides
Source: Royal Society of Chemistry journal article supplement (doi:10.1039/c4ra08741k), 2014-12-08

Supplementary Information

## Synthesis of 10b-fluorinated analogues of protubonine A and its 11a-epimer via fluorocyclisation of tryptophan-containing dipeptides

Tomoya Fujiwara,\* Hiroko Yasuda, Yushi Nishimura, Hisanori Nambu and Takayuki Yakura\*

Graduate School of Medicine and Pharmaceutical Sciences, University of Toyama,  
Sugitani, Toyama 930-0194, Japan.

### Contents

1.  $^1\text{H}$ ,  $^{13}\text{C}$  and  $^{19}\text{F}$  NMR Spectra

S1-S26

### 1. $^1\text{H}$ , $^{13}\text{C}$ and $^{19}\text{F}$ NMR Spectra

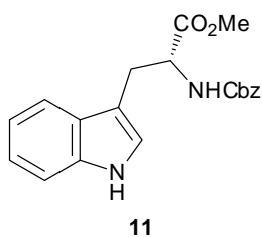

$^1\text{H}$  NMR (400 MHz,  $\text{CDCl}_3$ ) of **11**

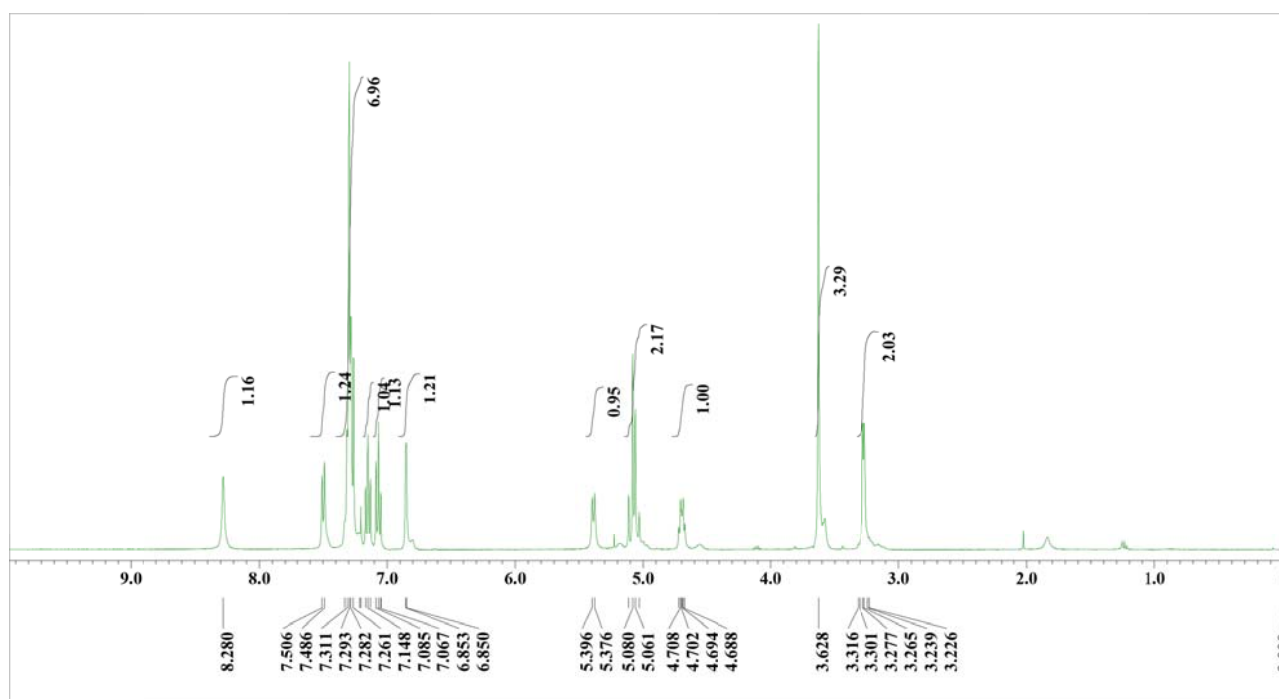

$^{13}\text{C}$  NMR (100 MHz,  $\text{CDCl}_3$ ) of **11**

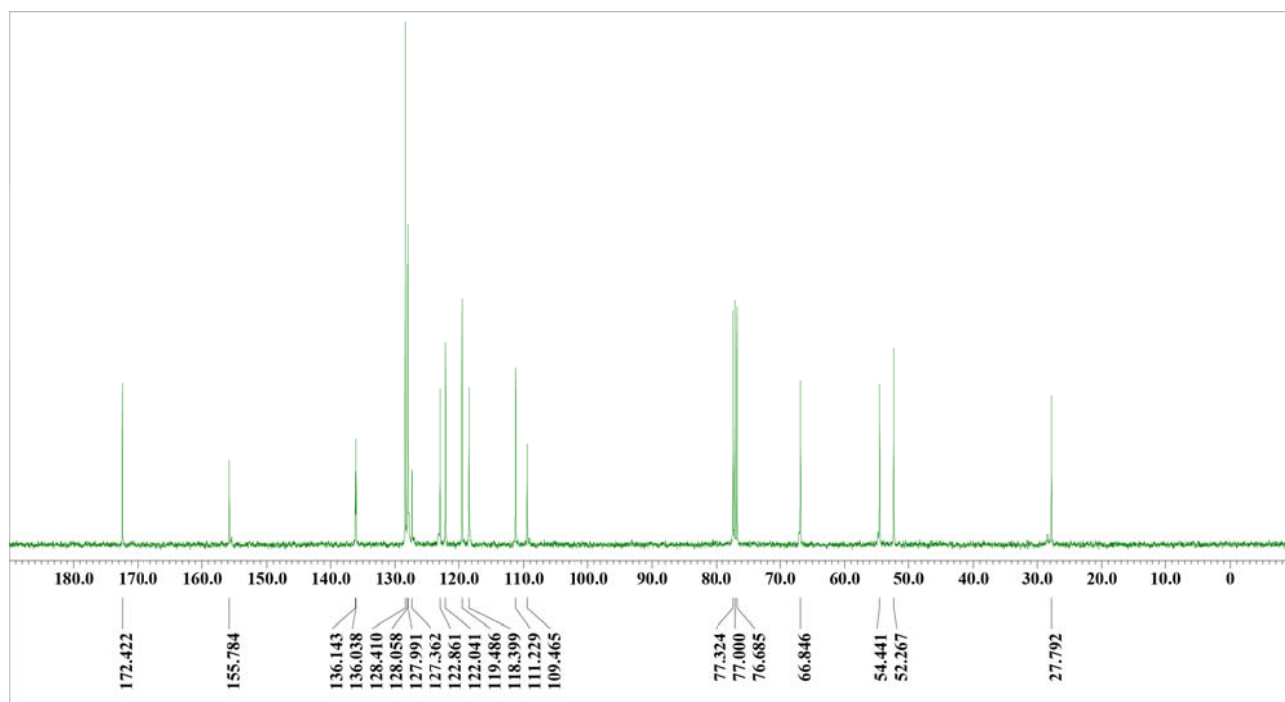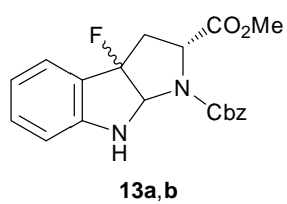

$^1\text{H}$  NMR (400 MHz,  $\text{CDCl}_3$ ) of **13a,b**

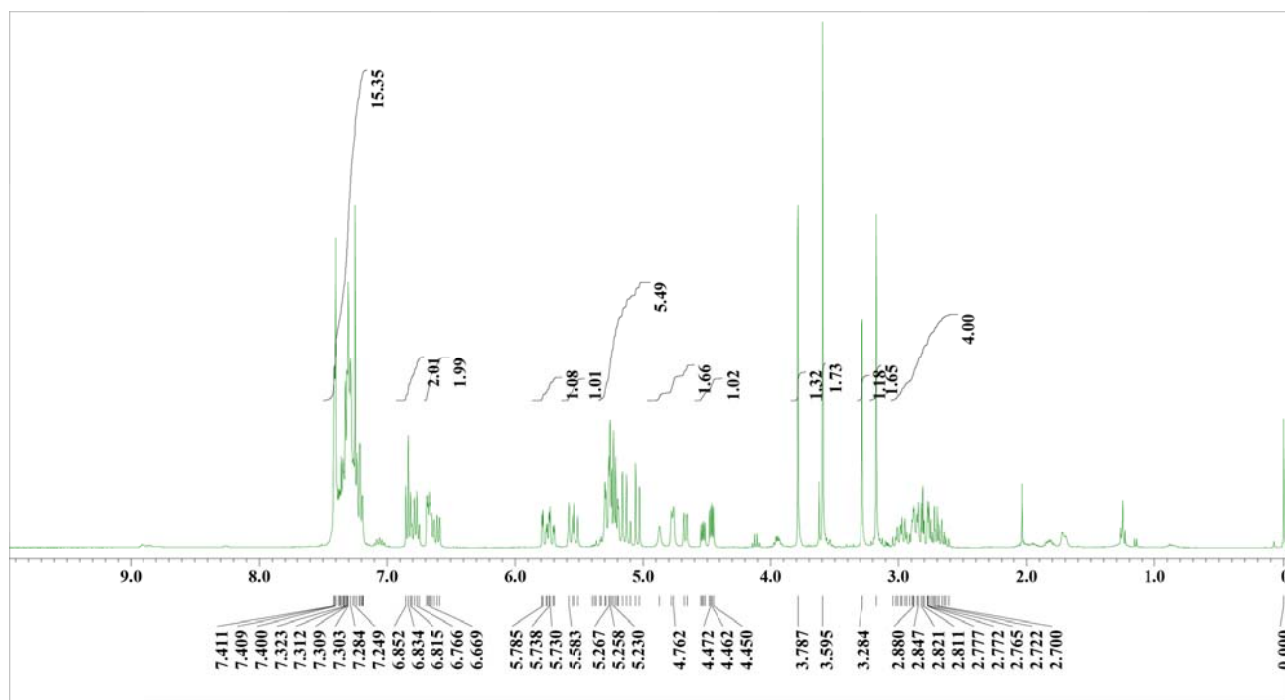

$^{19}\text{F}$  NMR (376 MHz,  $\text{CDCl}_3$ ) of **13a,b**

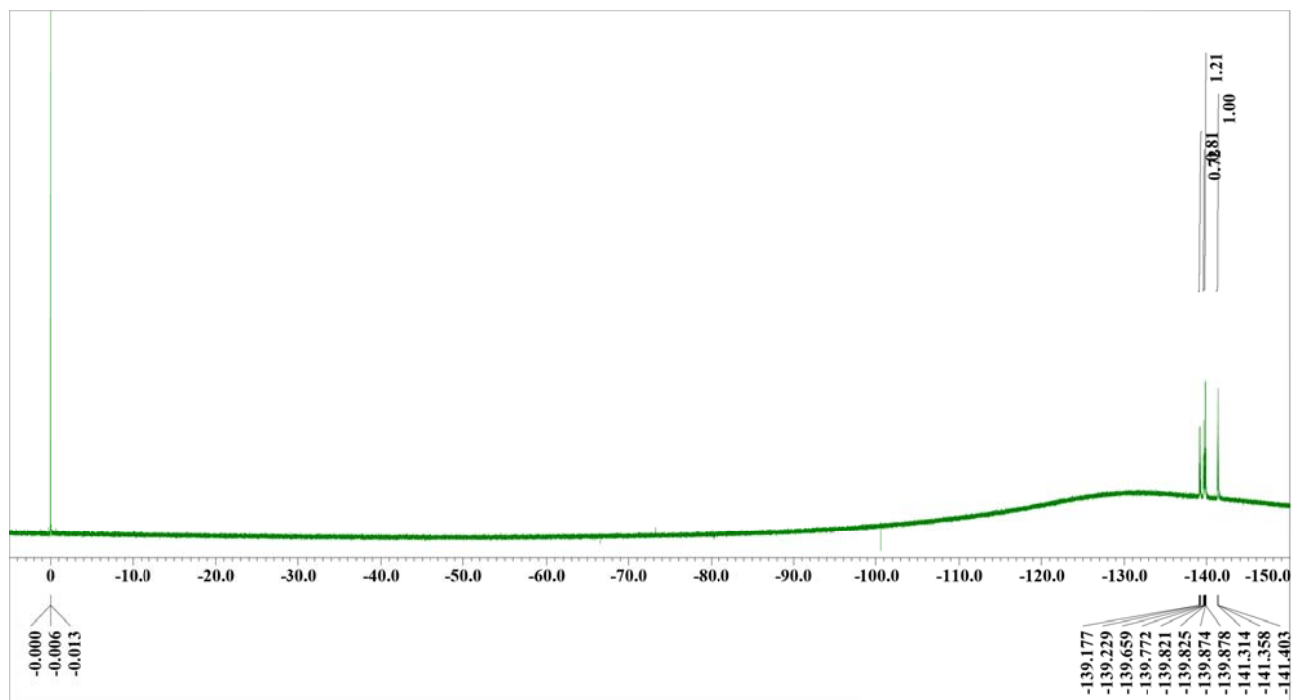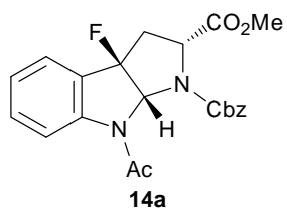

$^1\text{H}$  NMR (400 MHz,  $\text{CDCl}_3$ ) of **14a**

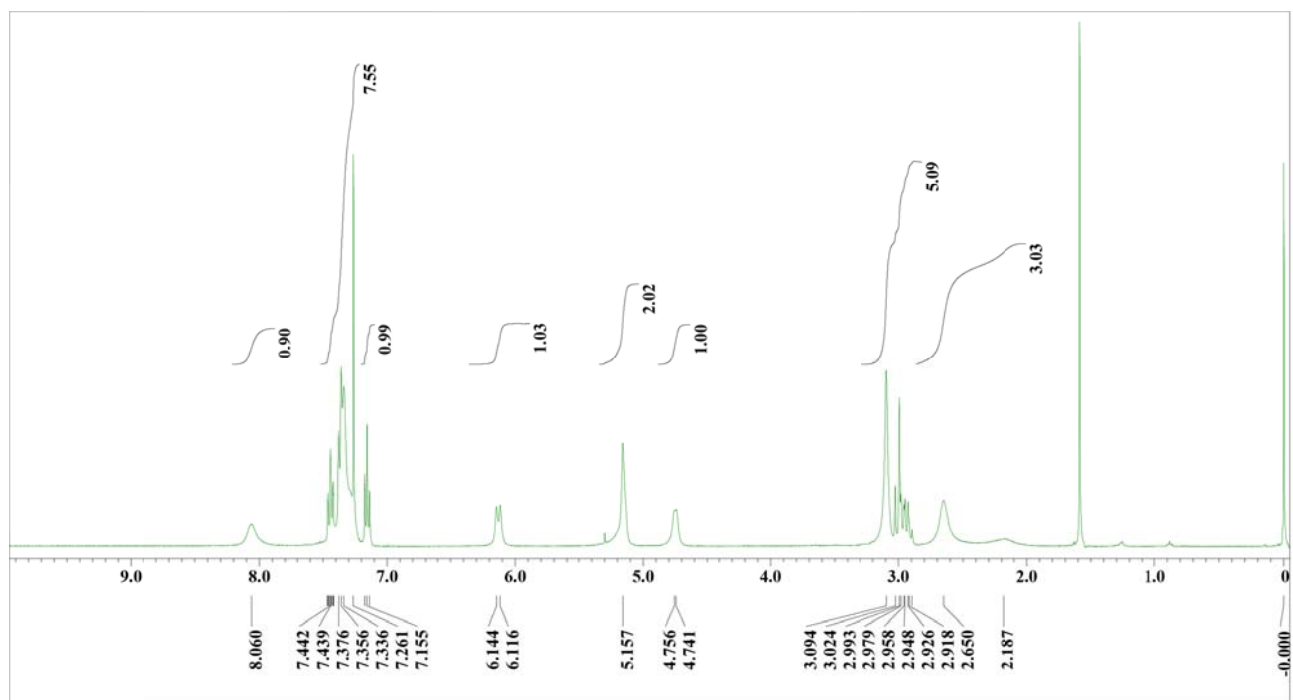

$^{13}\text{C}$  NMR (100 MHz,  $\text{CDCl}_3$ ) of **14a**

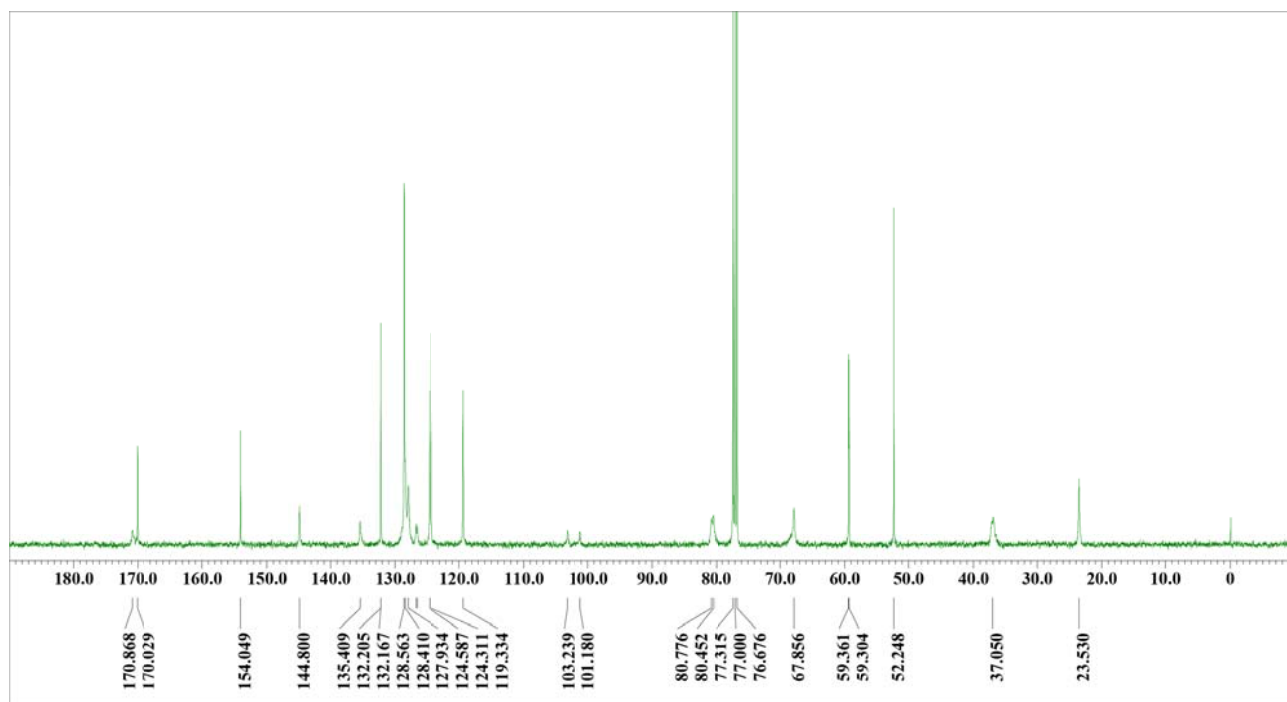

$^{19}\text{F}$  NMR (376 MHz,  $\text{CDCl}_3$ ) of **14a**

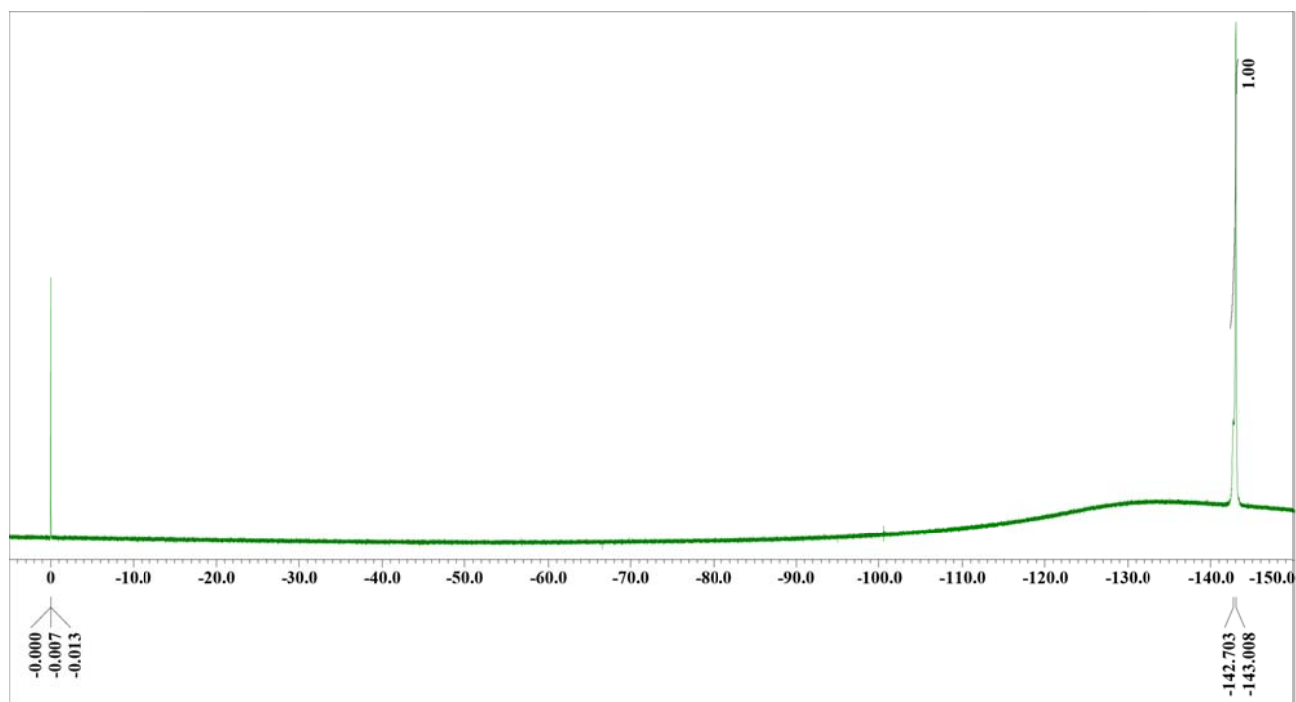

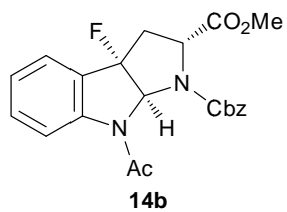

$^1\text{H}$  NMR (400 MHz,  $\text{CDCl}_3$ ) of **14b**

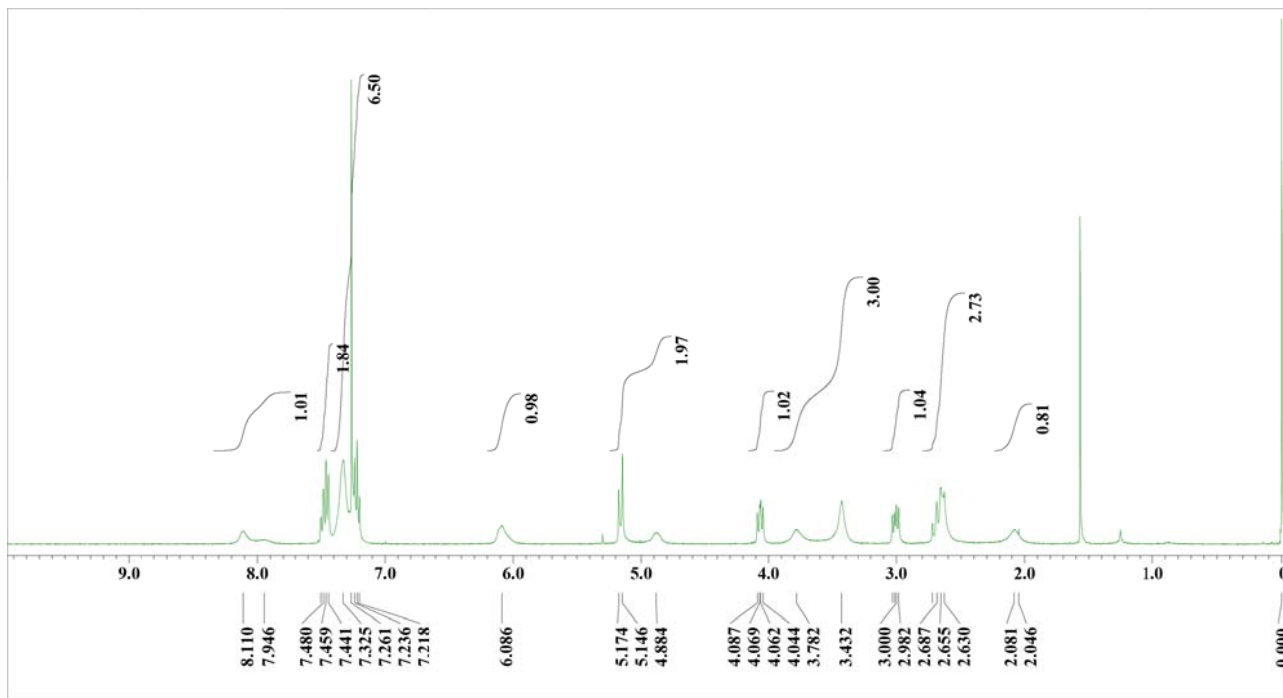

$^{13}\text{C}$  NMR (100 MHz,  $\text{CDCl}_3$ ) of **14b**

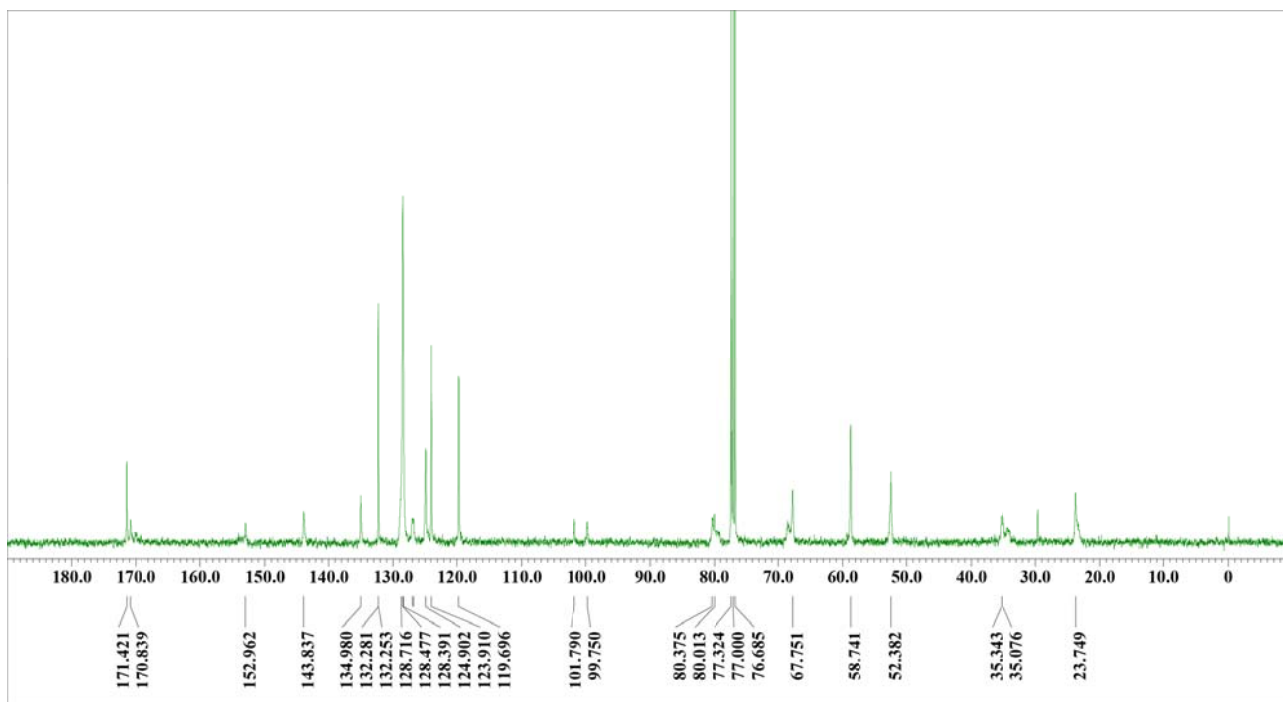

$^{19}\text{F}$  NMR (376 MHz,  $\text{CDCl}_3$ ) of **14b**

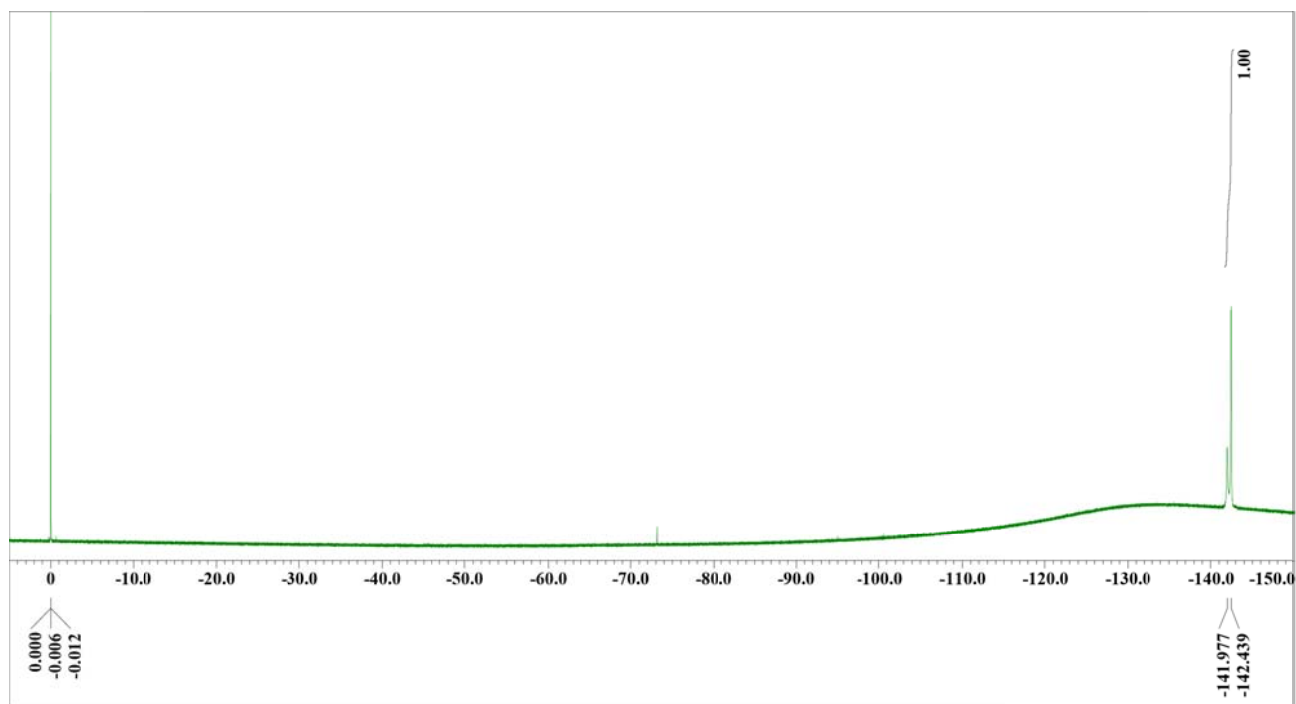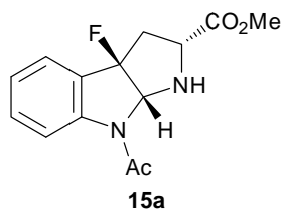

$^1\text{H}$  NMR (400 MHz,  $\text{CDCl}_3$ ) of **15a**

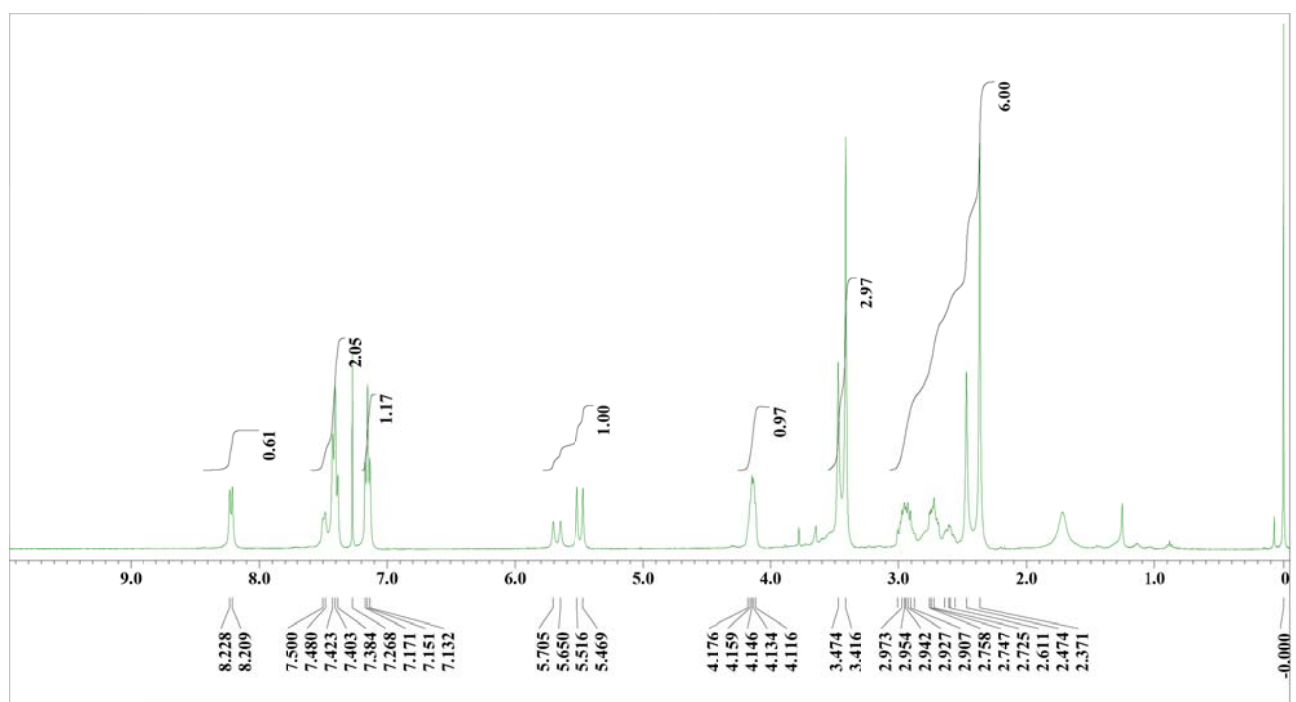

$^{13}\text{C}$  NMR (100 MHz,  $\text{CDCl}_3$ ) of **15a**

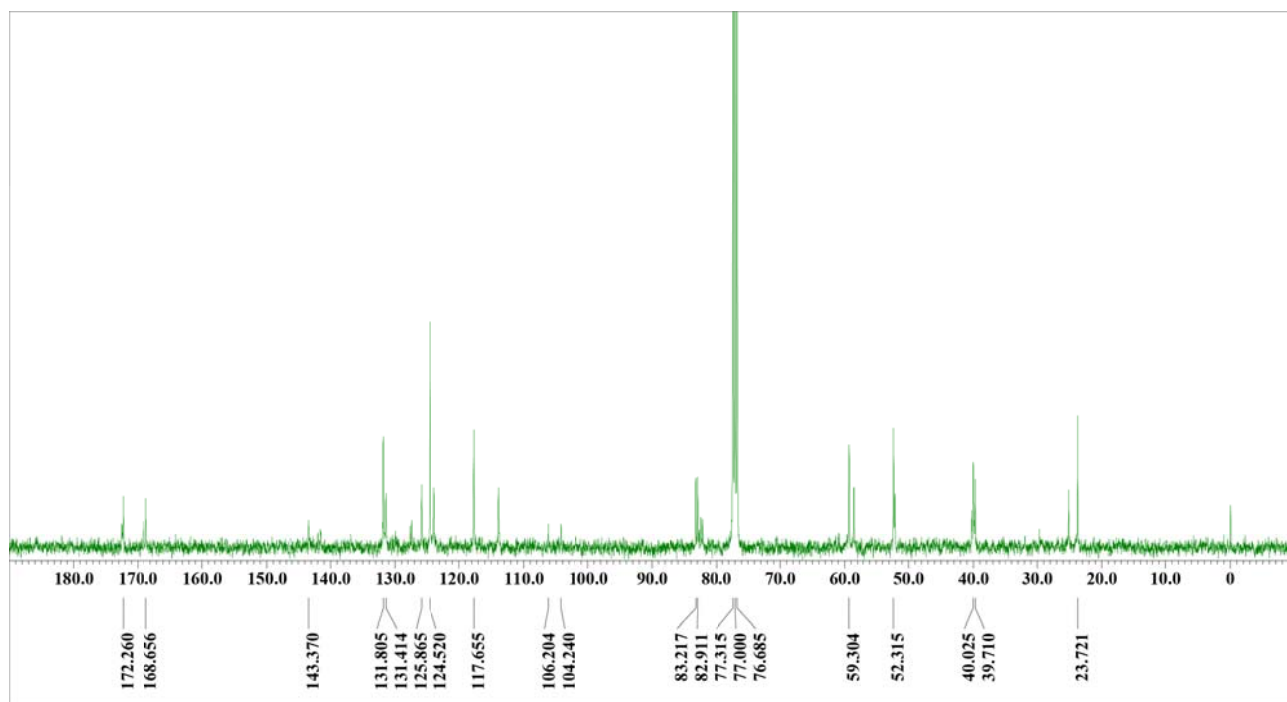

$^{19}\text{F}$  NMR (376 MHz,  $\text{CDCl}_3$ ) of **15a**

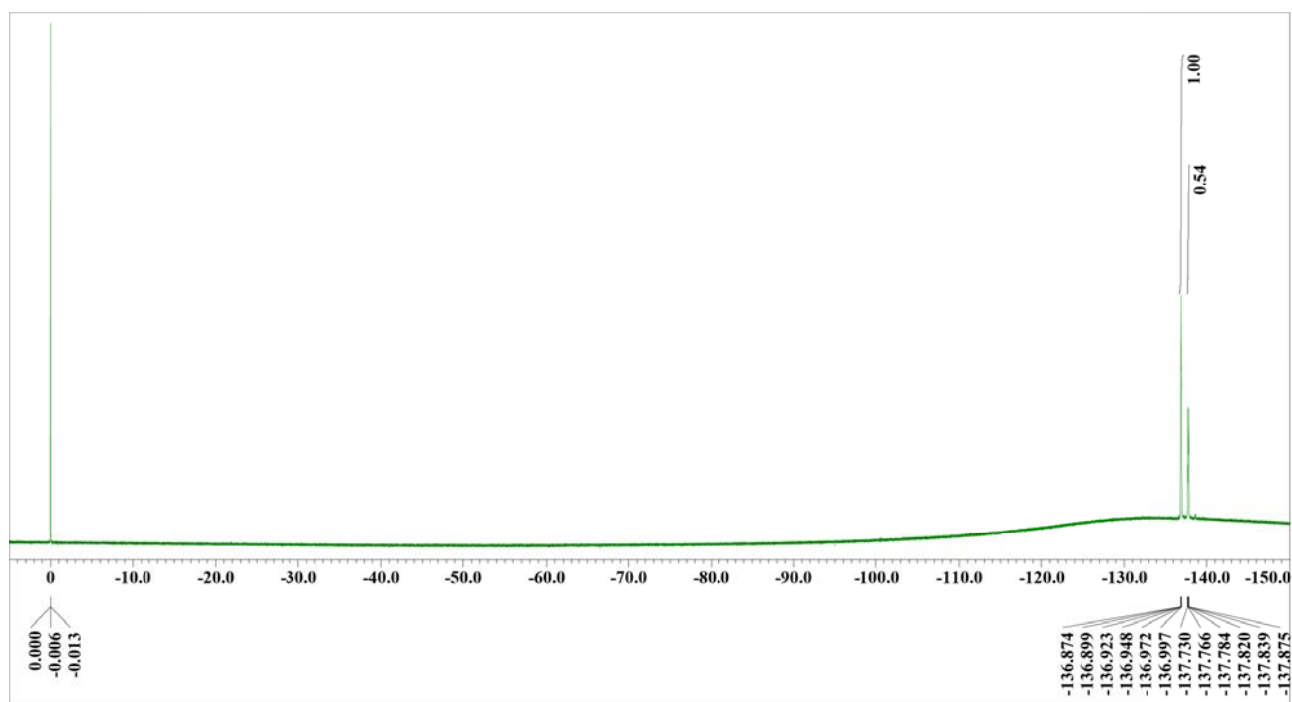

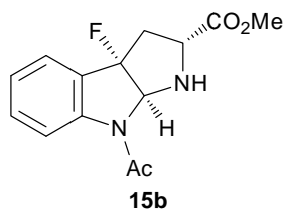

$^1\text{H}$  NMR (400 MHz,  $\text{CDCl}_3$ ) of **15b**

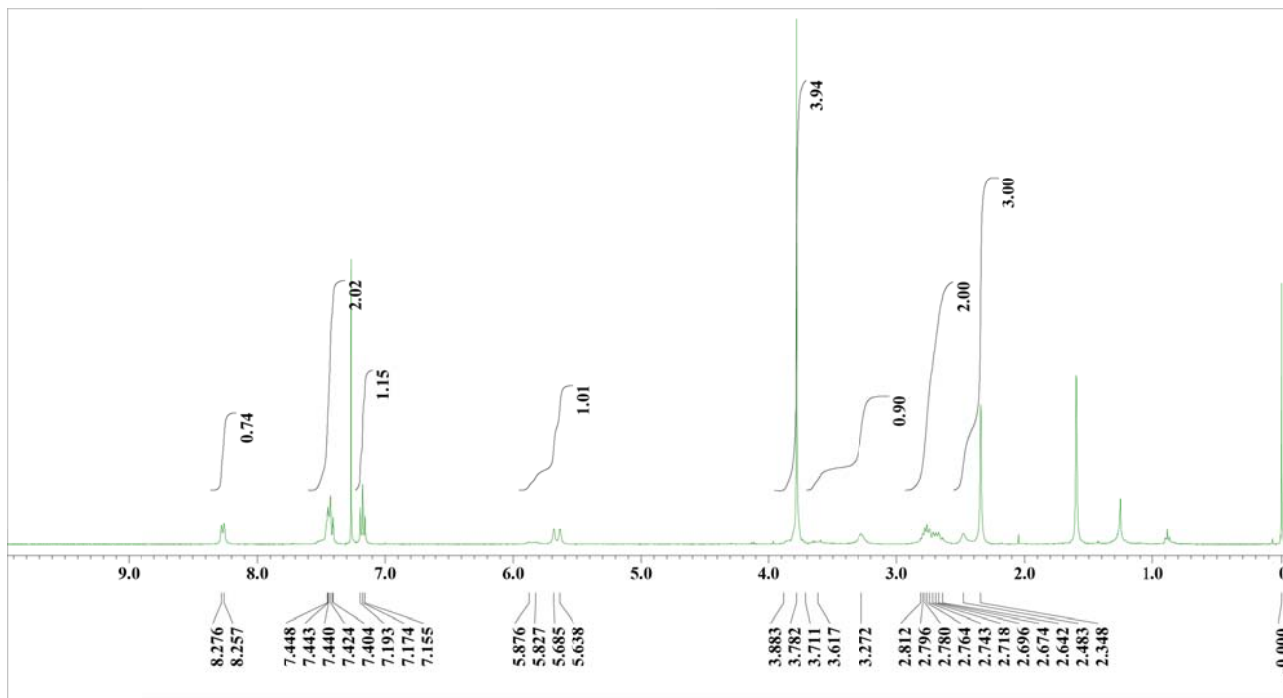

$^{13}\text{C}$  NMR (100 MHz,  $\text{CDCl}_3$ ) of **15b**

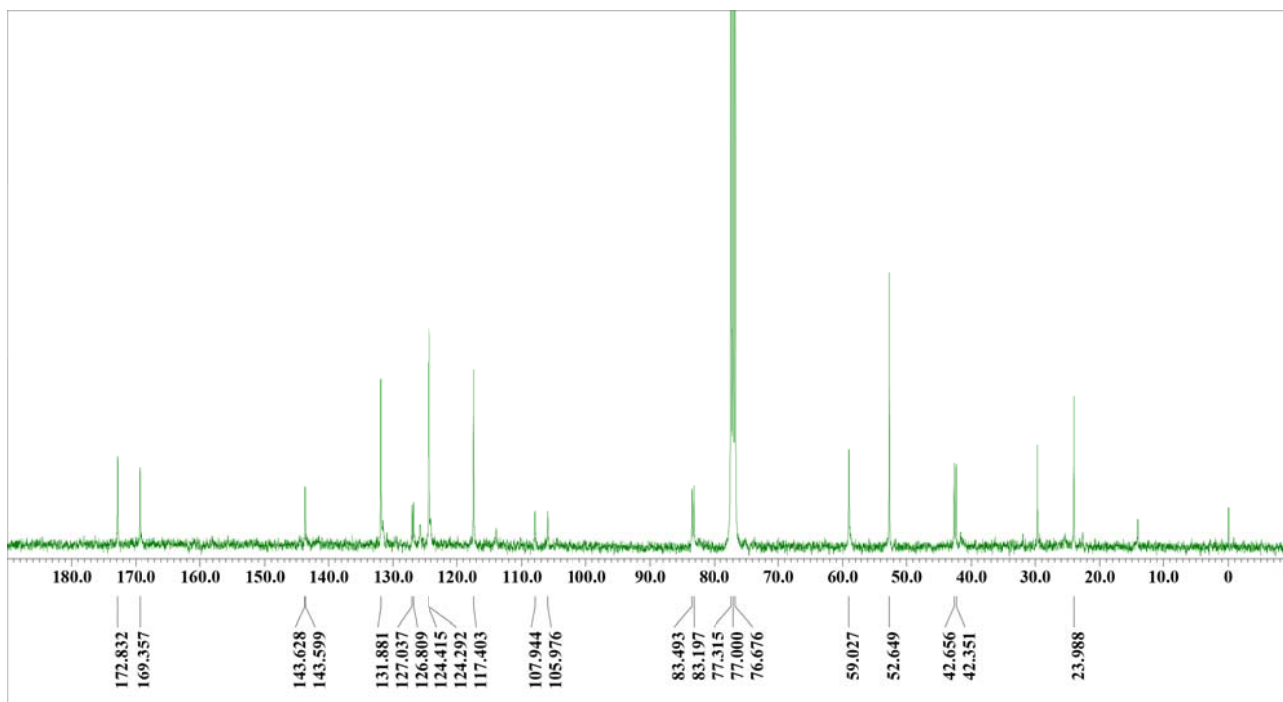



$^{19}\text{F}$  NMR (376 MHz,  $\text{CDCl}_3$ ) of **15b**

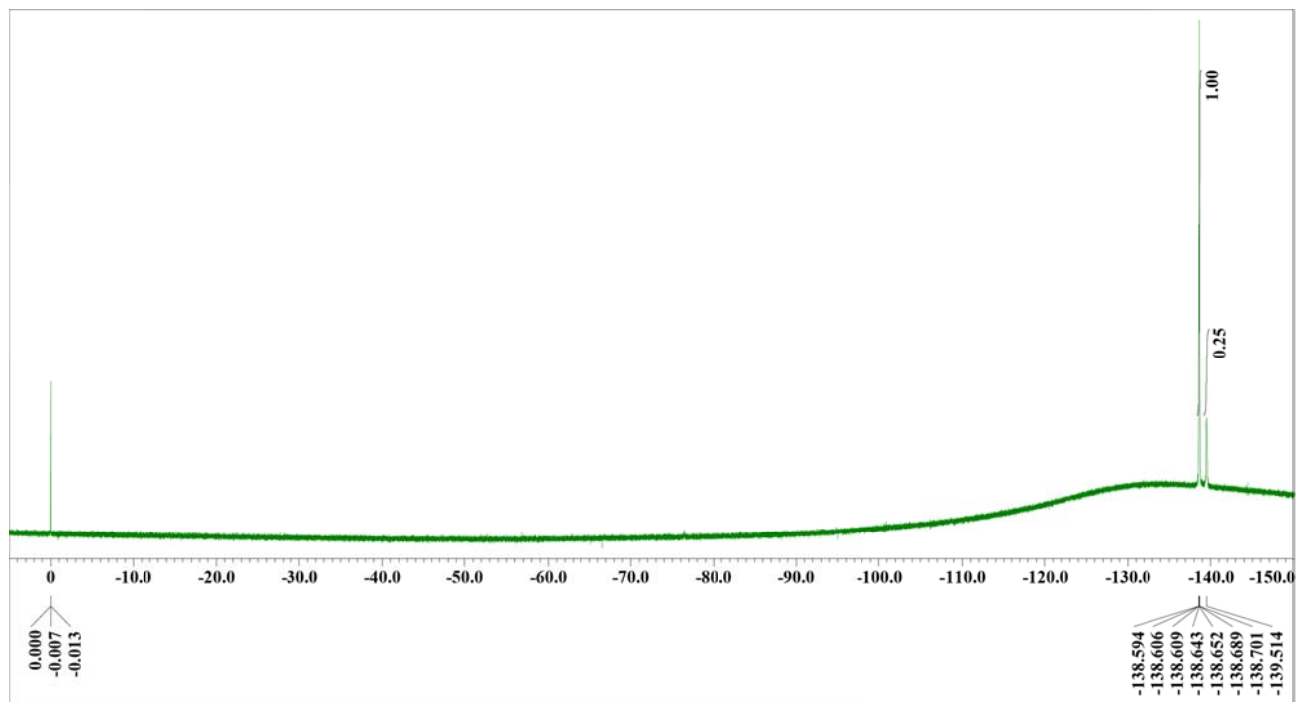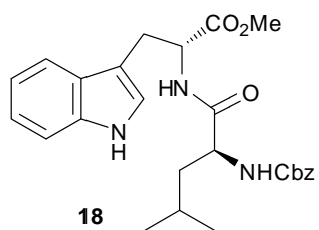

$^1\text{H}$  NMR (400 MHz,  $\text{CDCl}_3$ ) of **18**

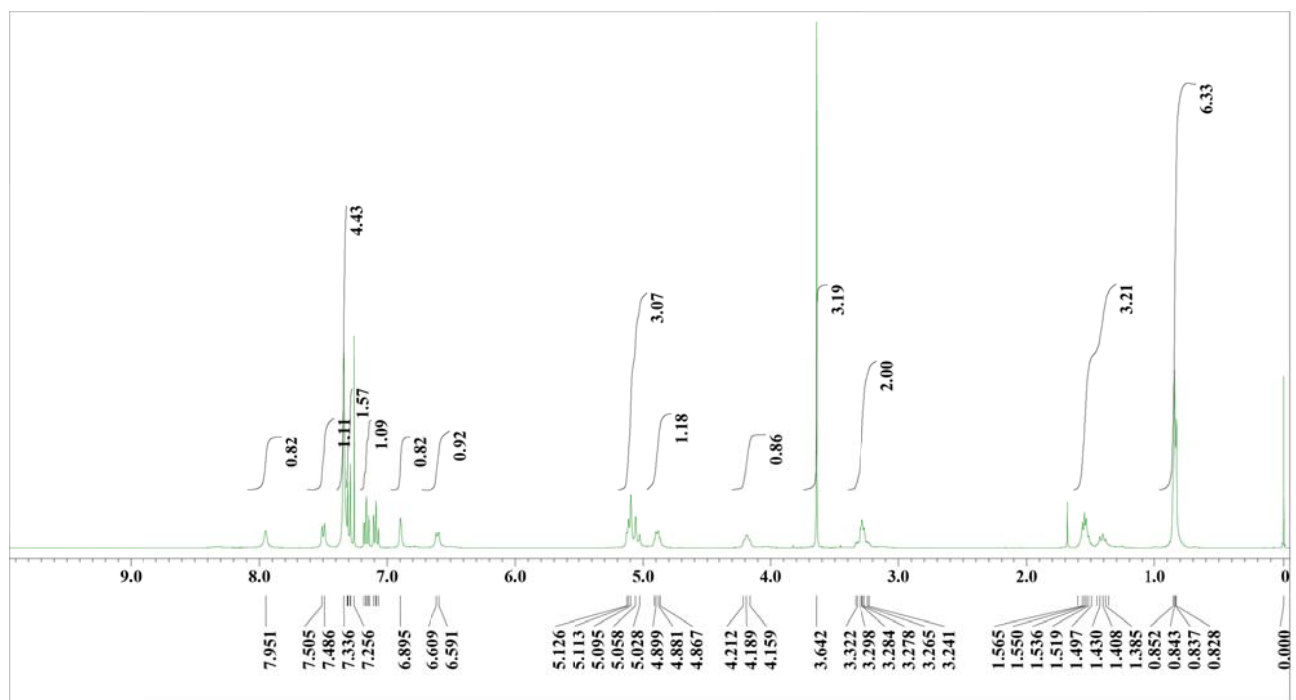

$^{13}\text{C}$  NMR (100 MHz,  $\text{CDCl}_3$ ) of **18**

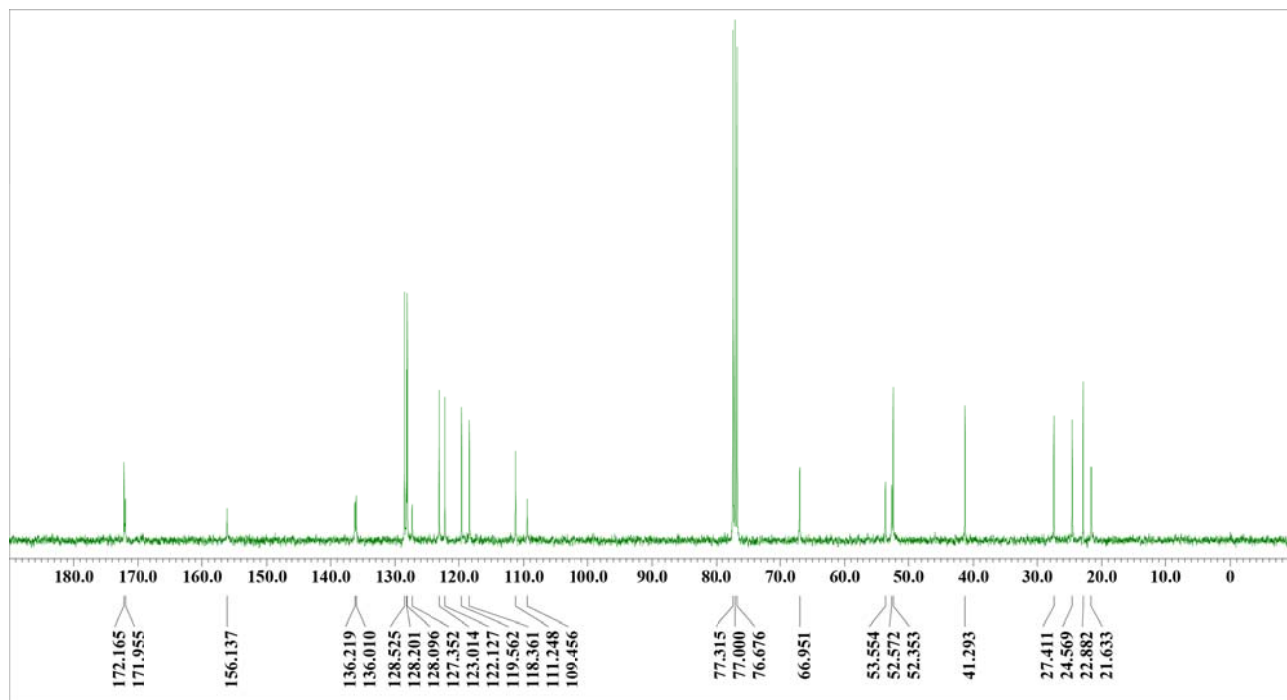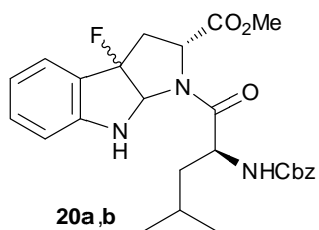

$^1\text{H}$  NMR (400 MHz,  $\text{CDCl}_3$ ) of **20a,b**

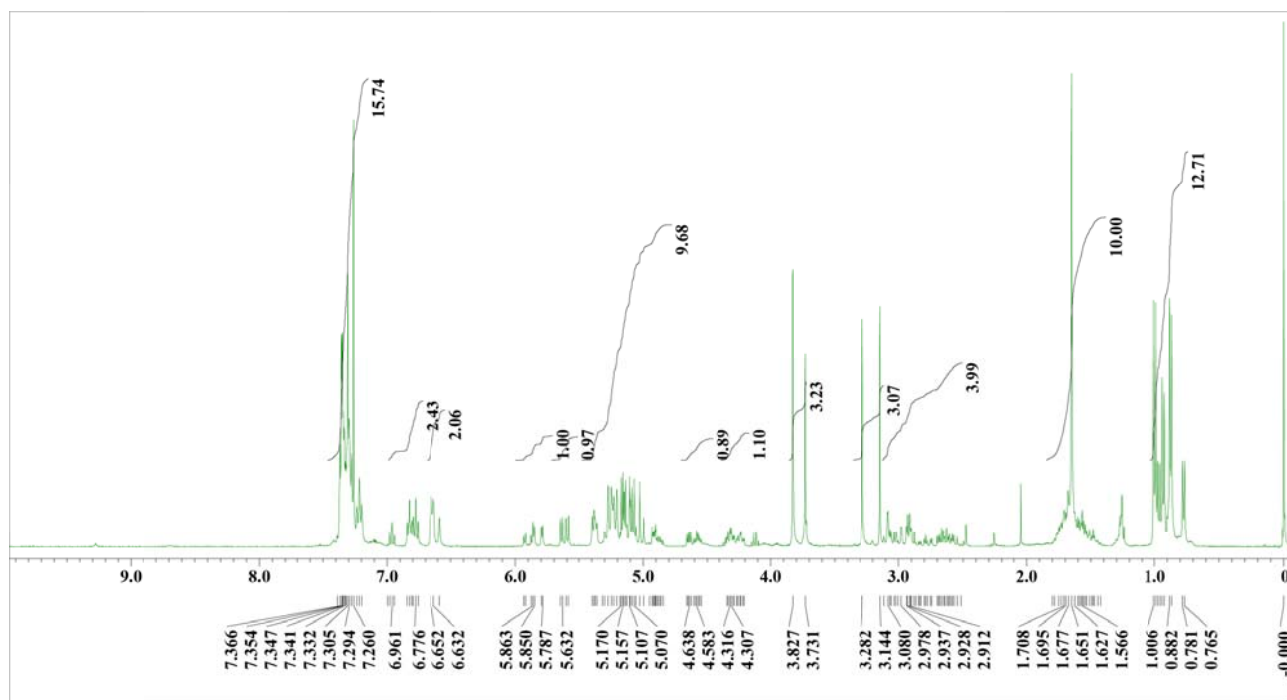

$^{19}\text{F}$  NMR (376 MHz,  $\text{CDCl}_3$ ) of **20a,b**

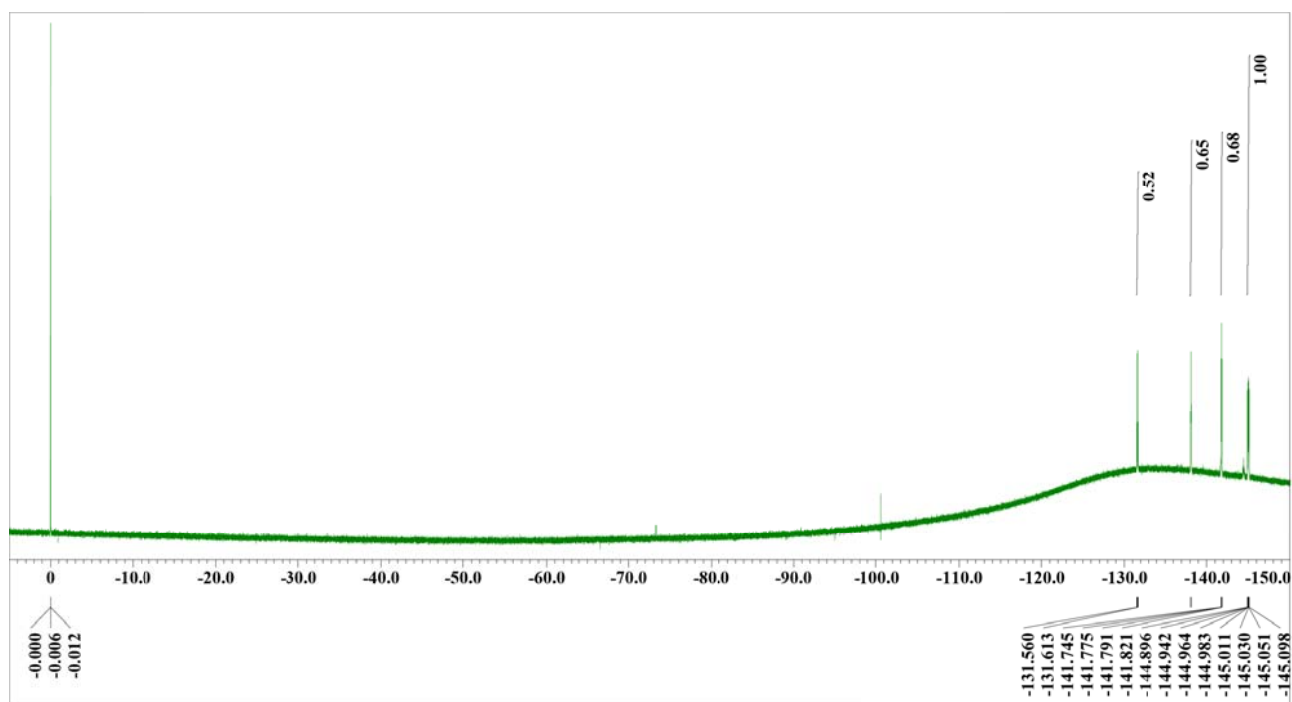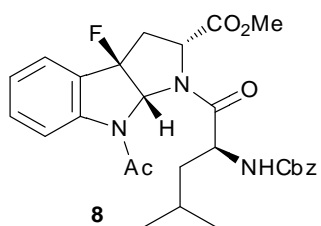

$^1\text{H}$  NMR (400 MHz,  $\text{CDCl}_3$ ) of **8**

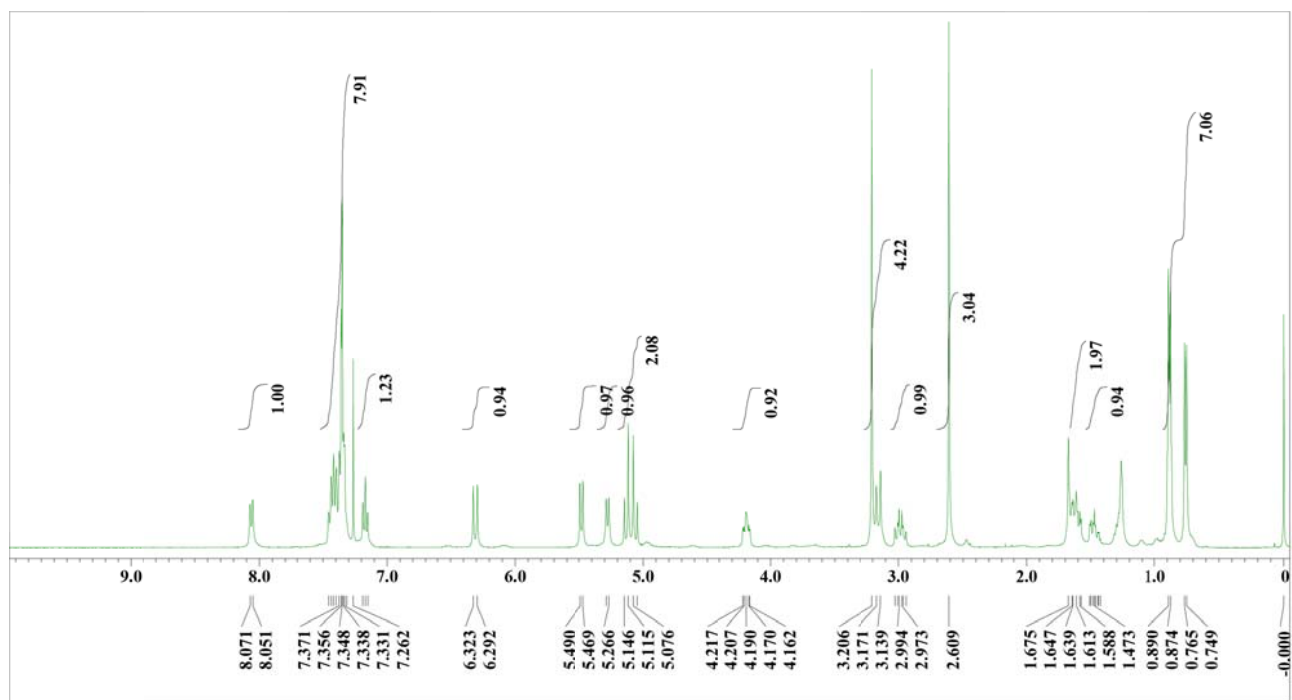

$^{13}\text{C}$  NMR (100 MHz,  $\text{CDCl}_3$ ) of **8**

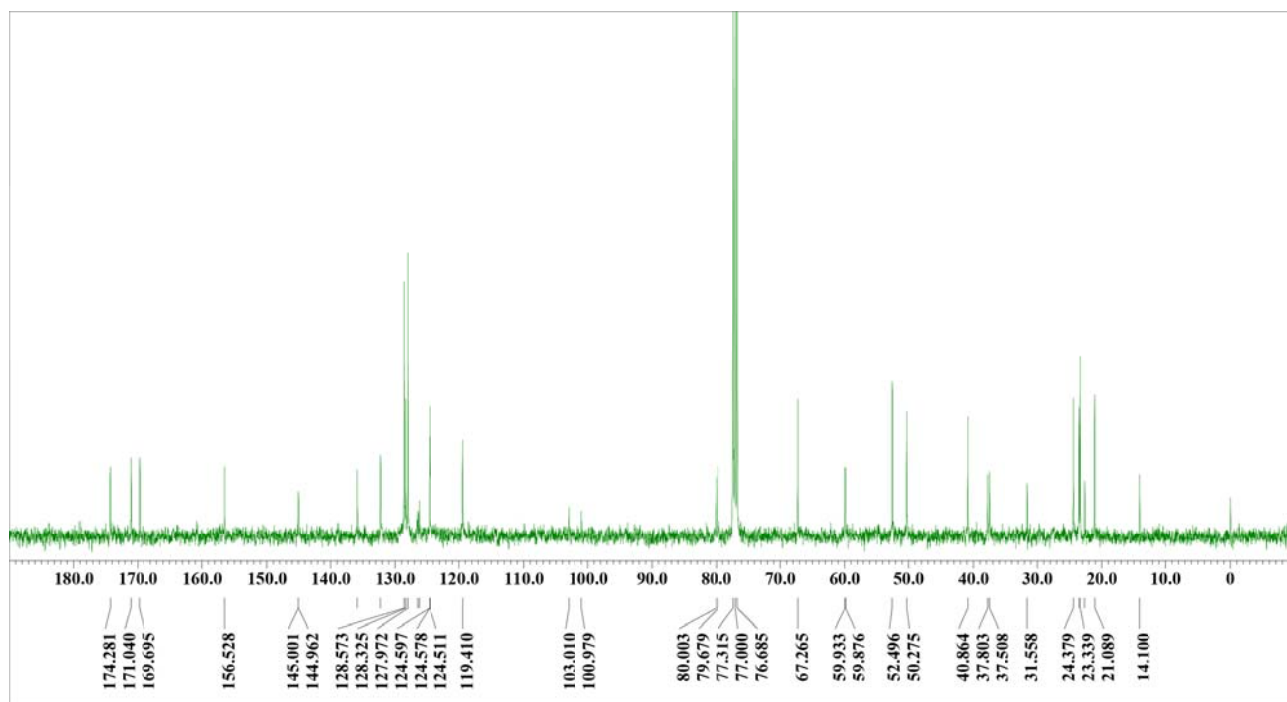

$^{19}\text{F}$  NMR (376 MHz,  $\text{CDCl}_3$ ) of **8**

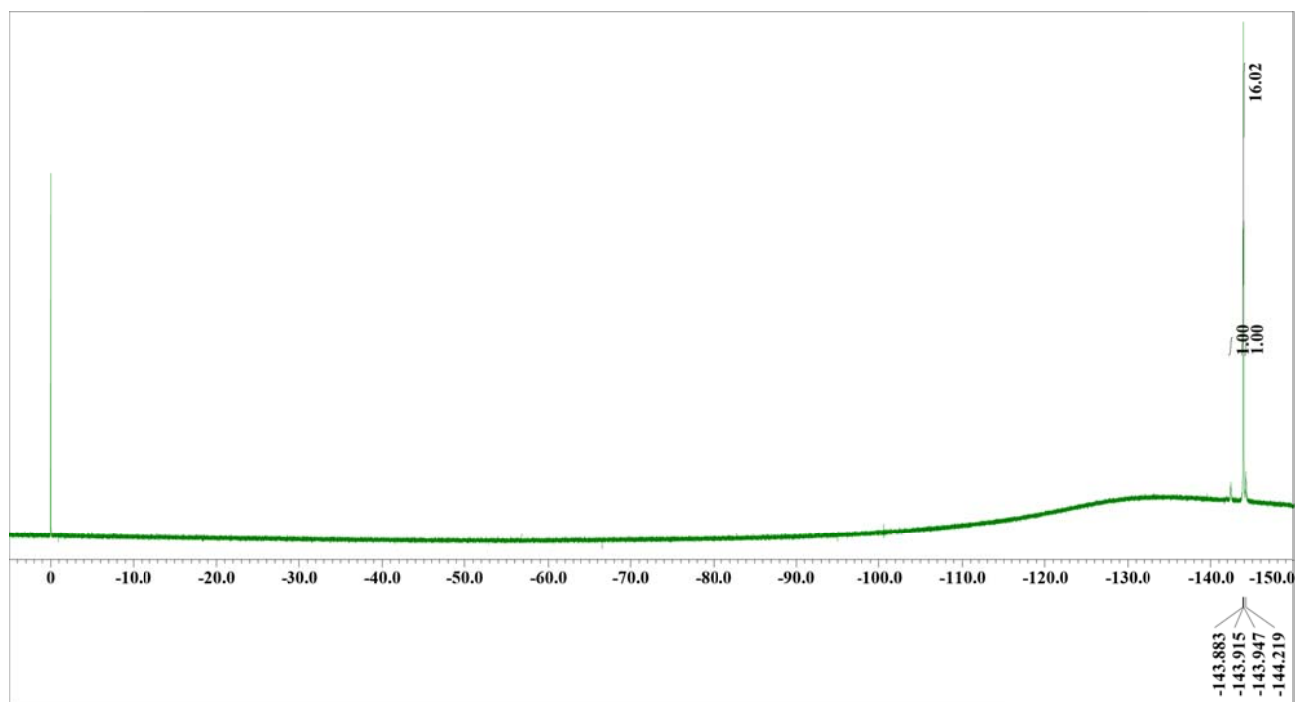

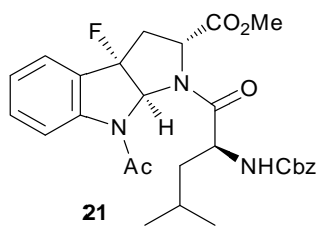

$^1\text{H}$  NMR (400 MHz,  $\text{CDCl}_3$ ) of **21**

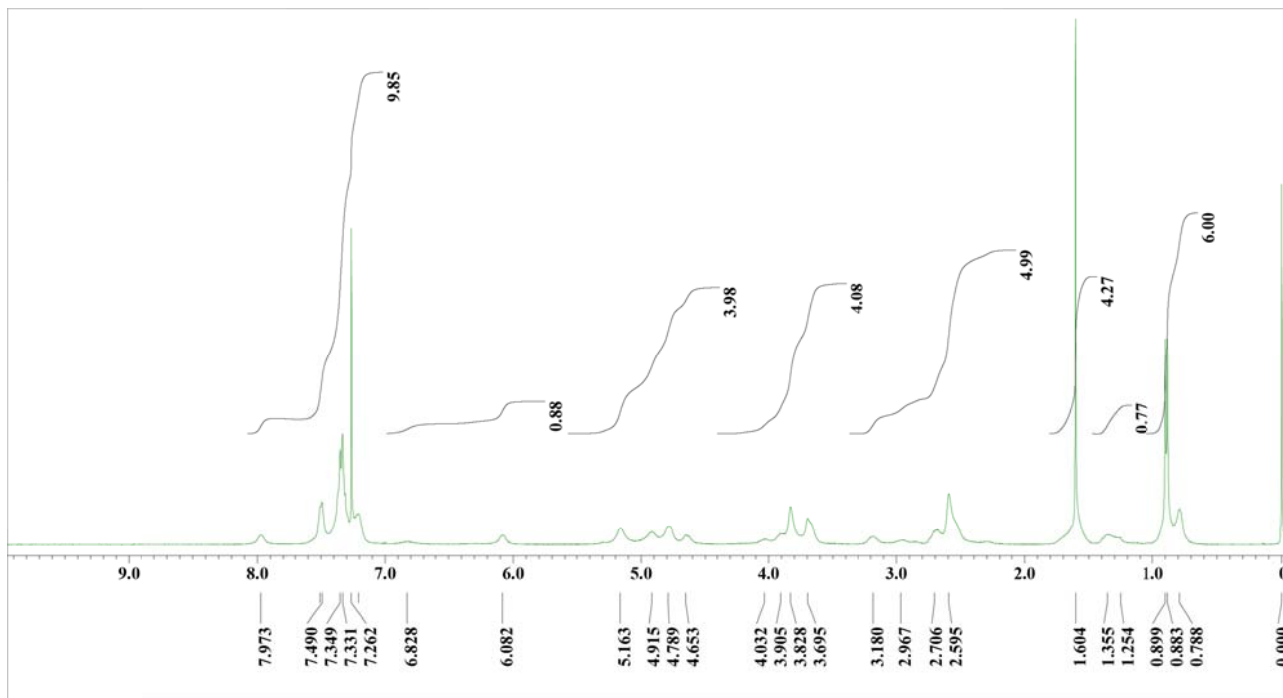

$^{19}\text{F}$  NMR (376 MHz,  $\text{CDCl}_3$ ) of **21**

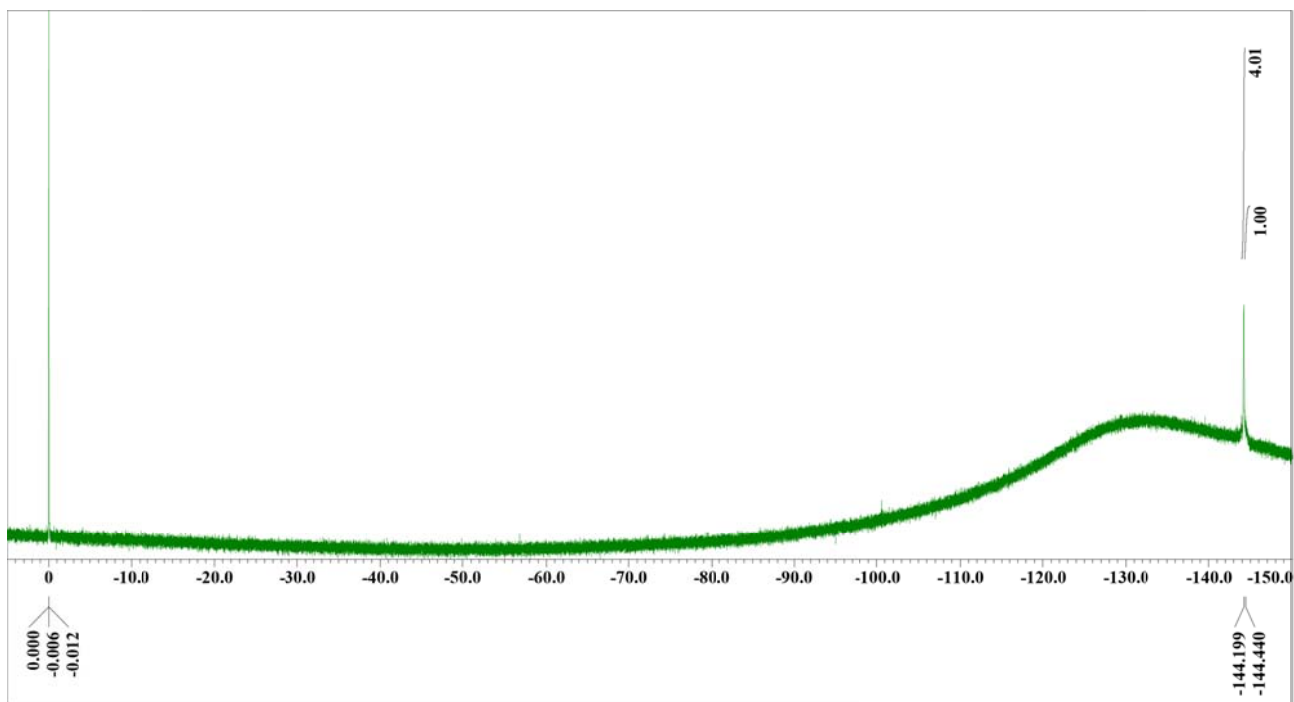

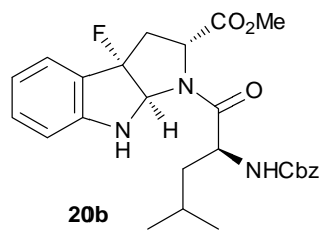

$^1\text{H}$  NMR (400 MHz,  $\text{CDCl}_3$ ) of **20b**

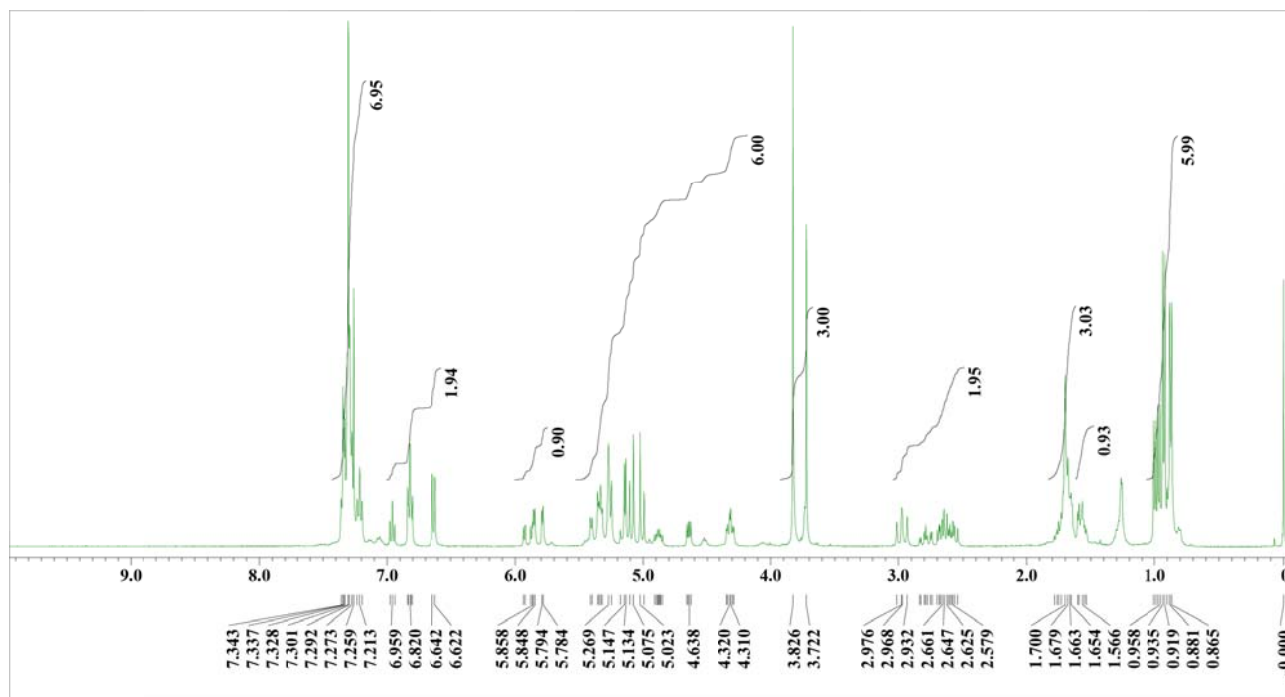

$^{13}\text{C}$  NMR (100 MHz,  $\text{CDCl}_3$ ) of **20b**

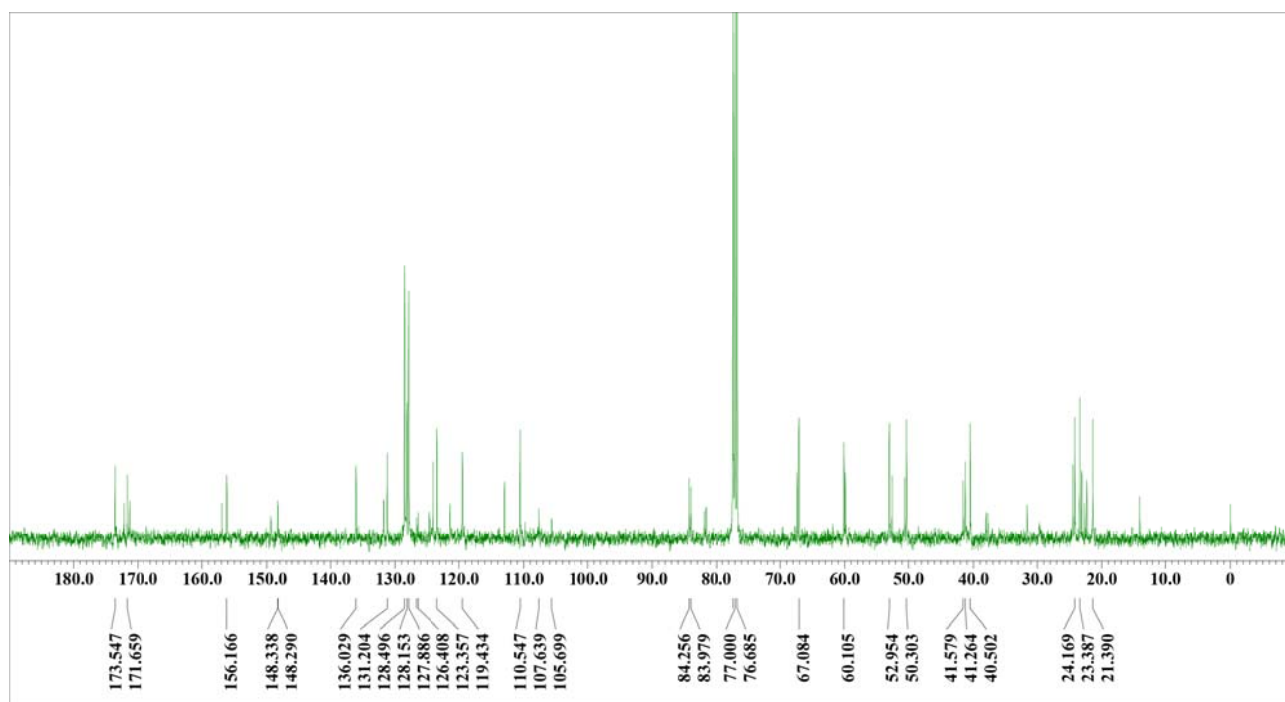

$^{19}\text{F}$  NMR (376 MHz,  $\text{CDCl}_3$ ) of **20b**

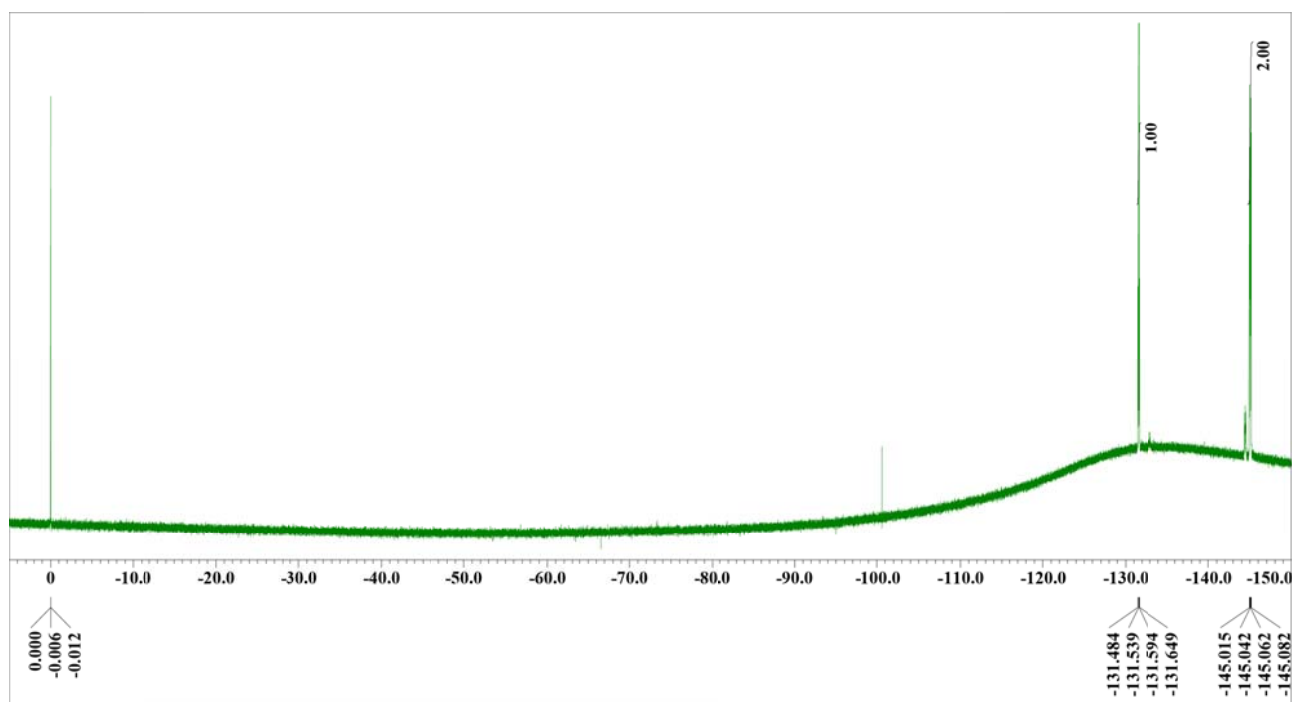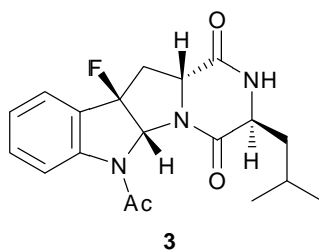

$^1\text{H}$  NMR (400 MHz,  $\text{CDCl}_3$ ) of **3**

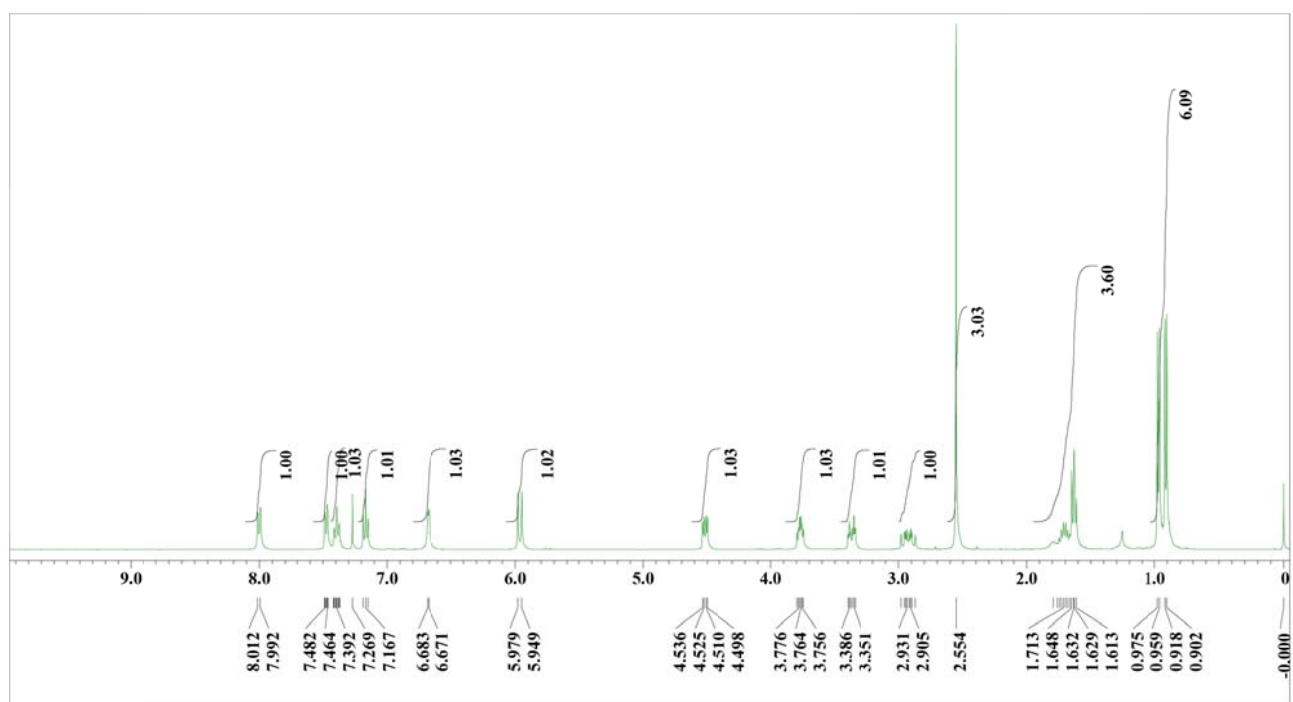

$^{13}\text{C}$  NMR (100 MHz,  $\text{CDCl}_3$ ) of **3**

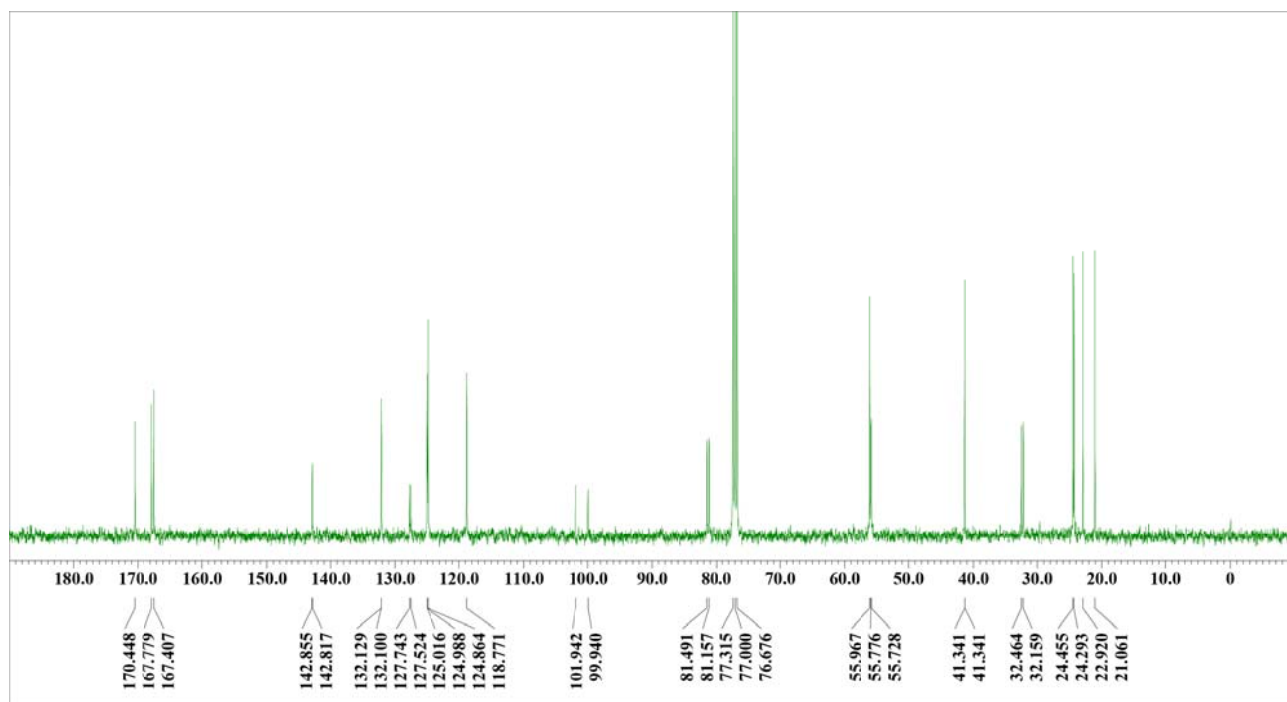

$^{19}\text{F}$  NMR (376 MHz,  $\text{CDCl}_3$ ) of **3**

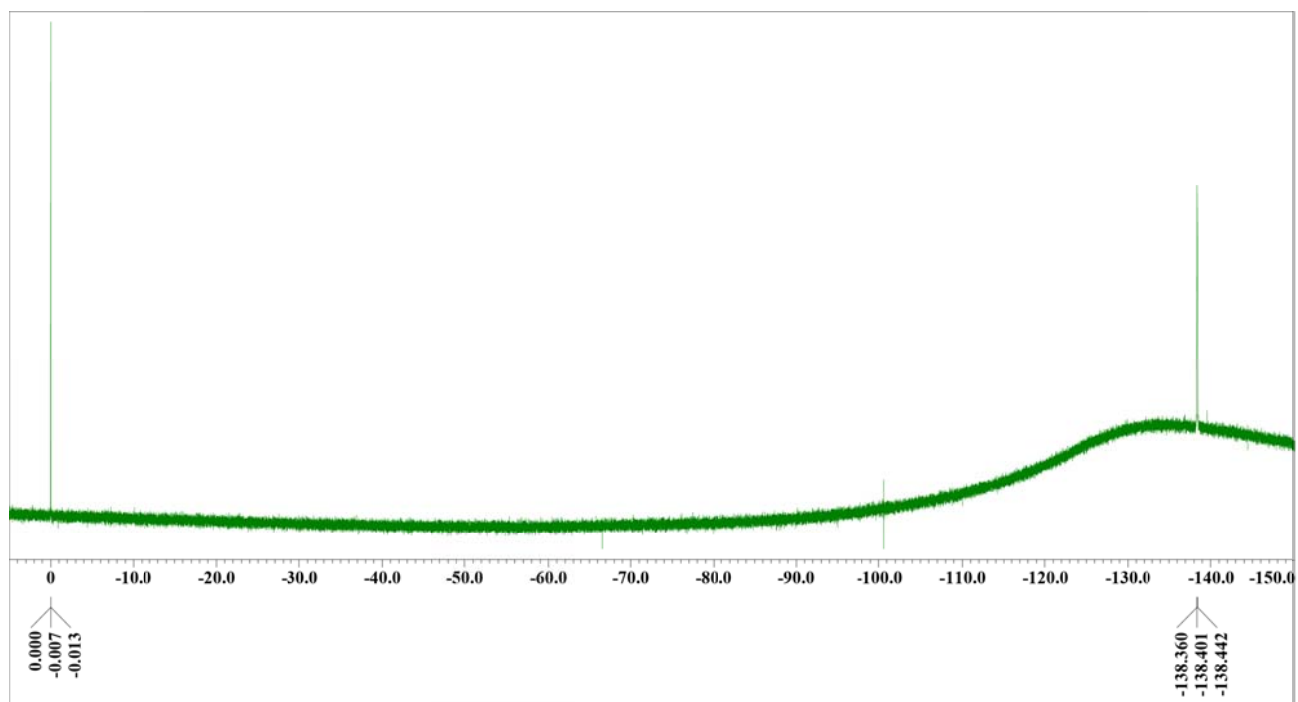



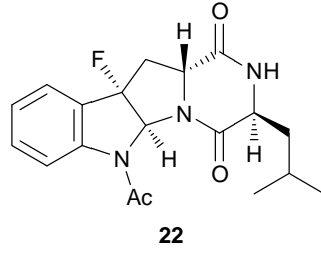

<sup>1</sup>H NMR (400 MHz, CDCl<sub>3</sub>) of **22**

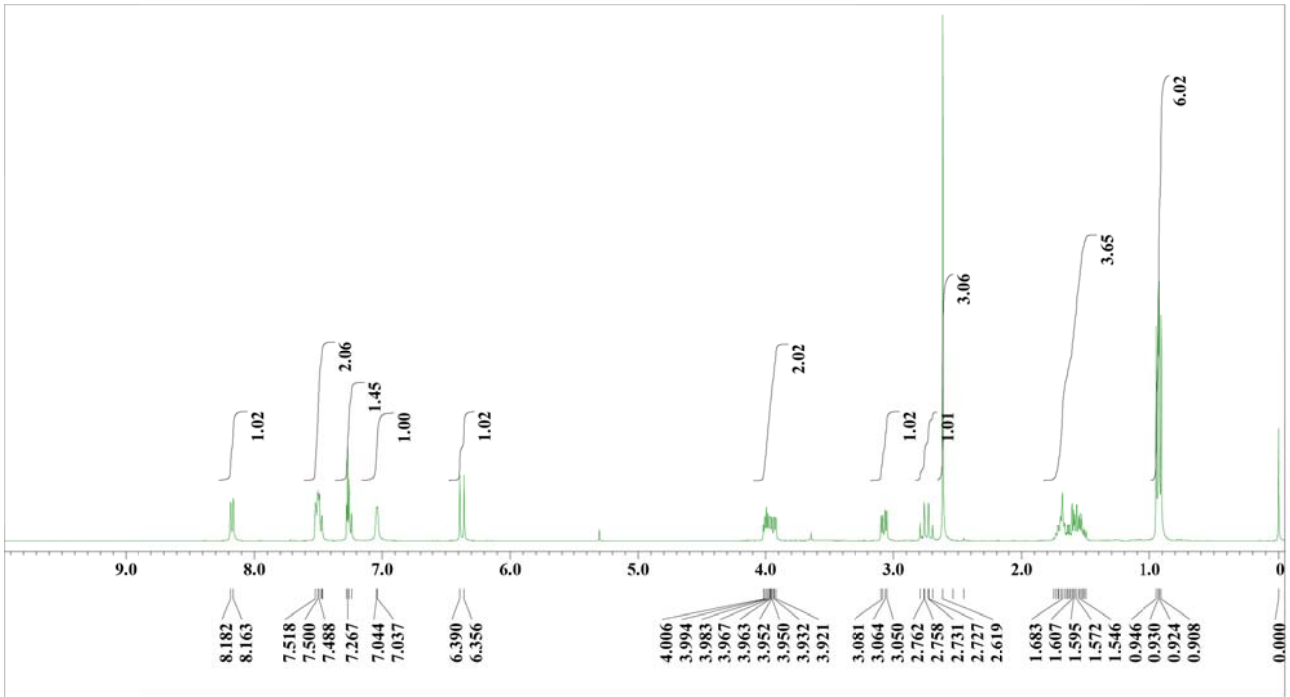

<sup>13</sup>C NMR (100 MHz, CDCl<sub>3</sub>) of **22**

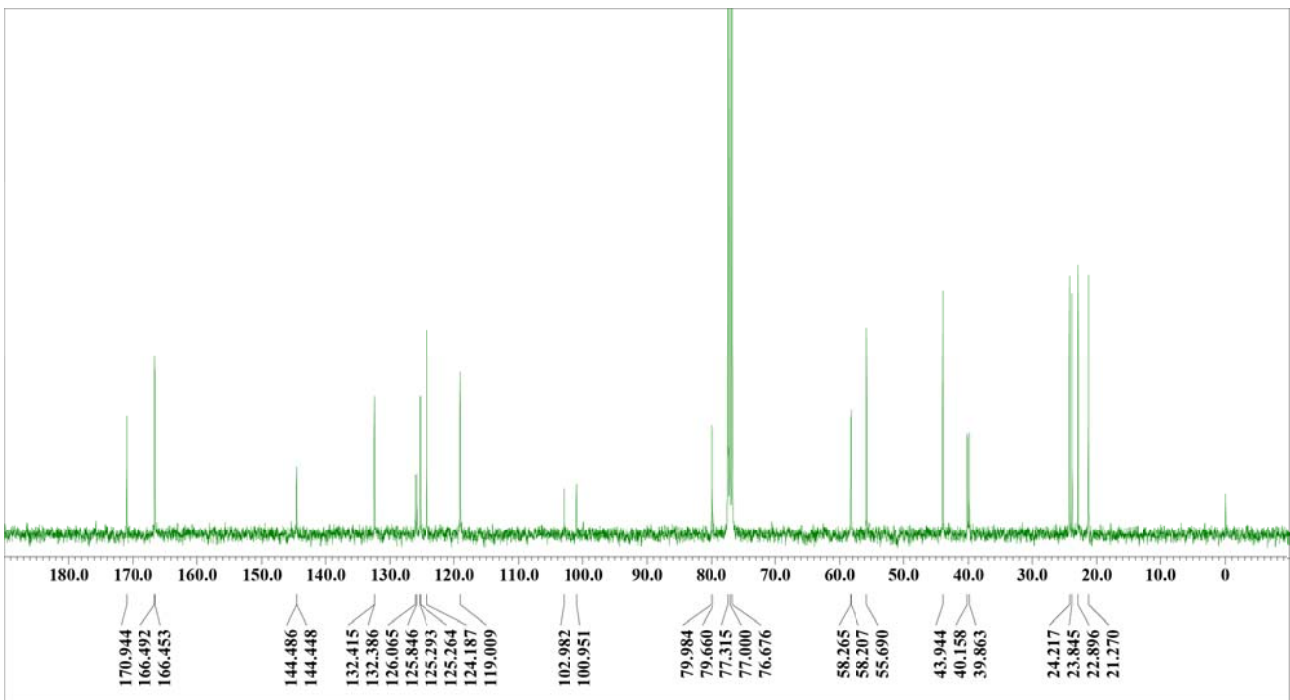

$^{19}\text{F}$  NMR (376 MHz,  $\text{CDCl}_3$ ) of **22**

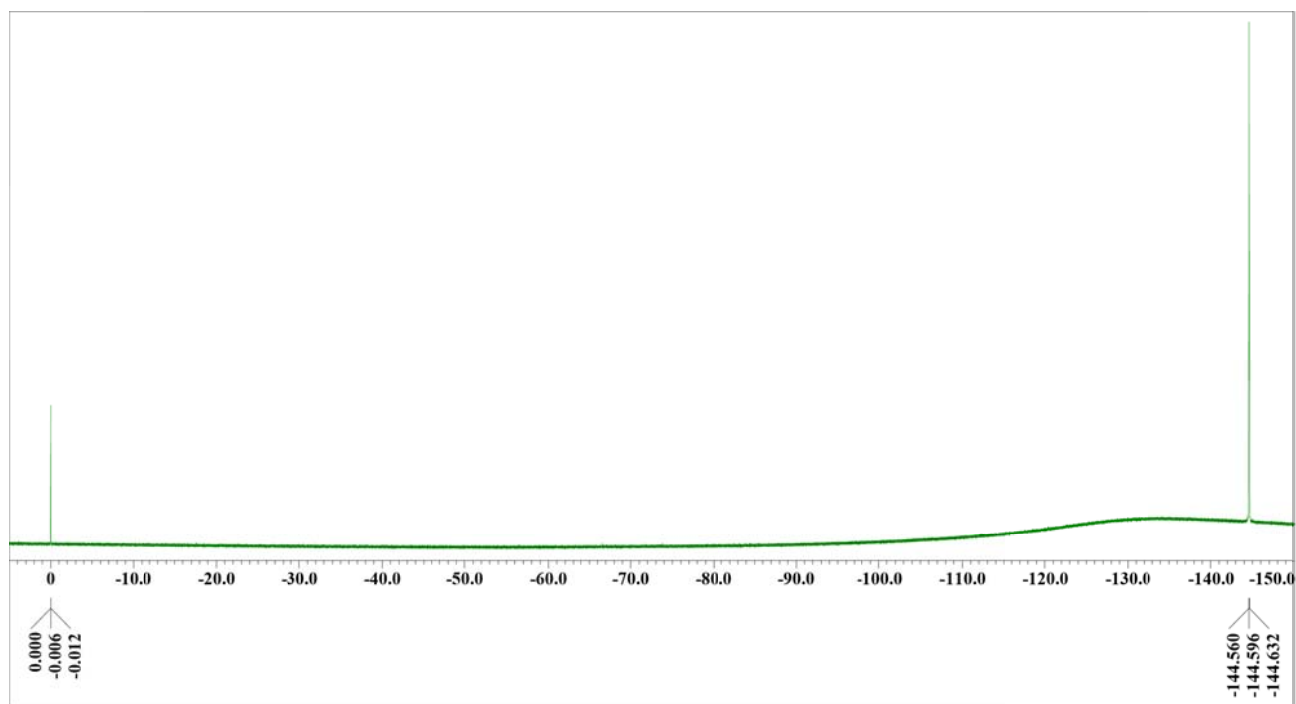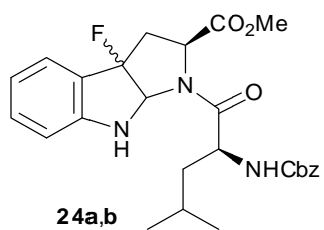

$^1\text{H}$  NMR (500 MHz,  $\text{CDCl}_3$ ) of **24a,b**

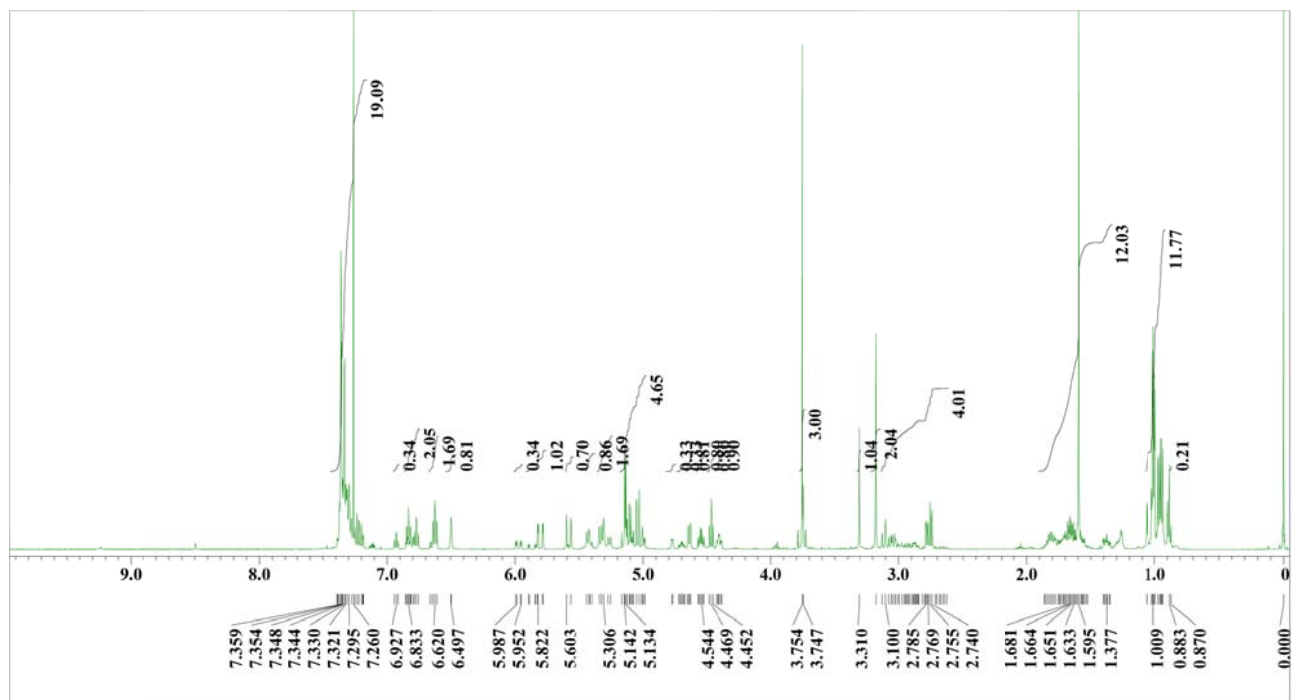

$^{19}\text{F}$  NMR (470 MHz,  $\text{CDCl}_3$ ) of **24a,b**

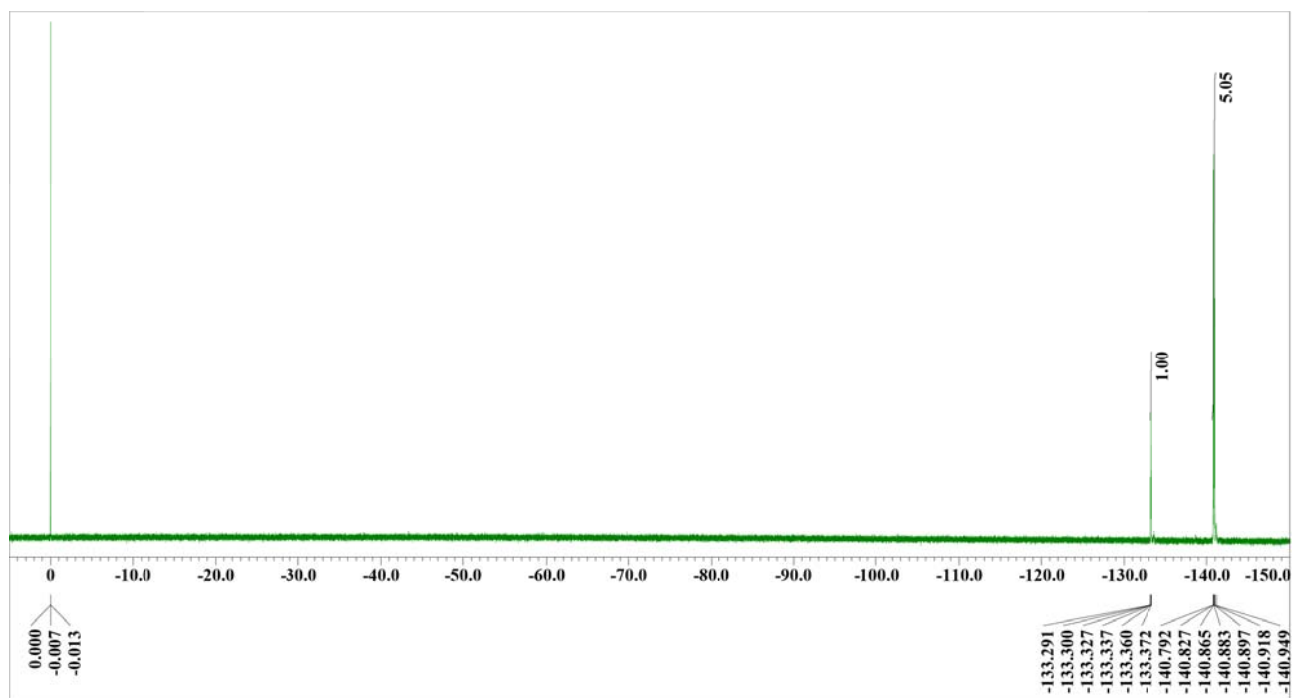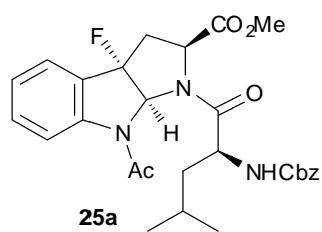

$^1\text{H}$  NMR (500 MHz,  $\text{CDCl}_3$ ) of **25a**

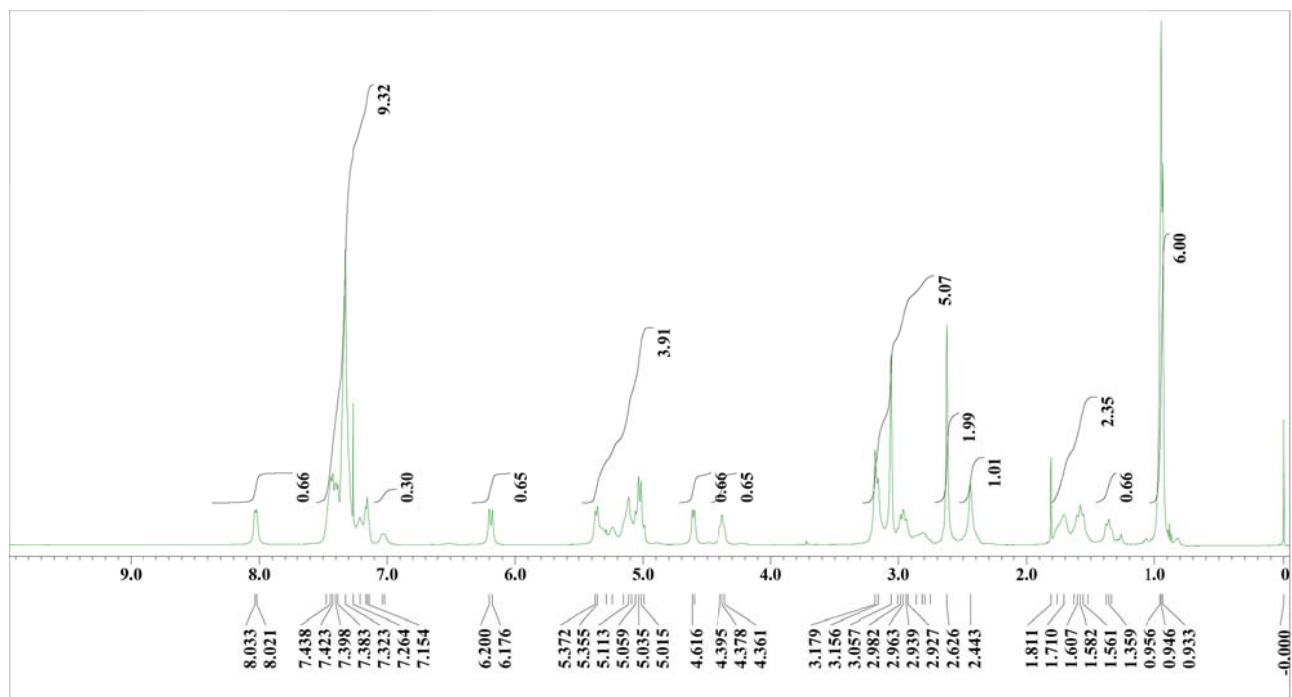

$^{13}\text{C}$  NMR (126 MHz,  $\text{CDCl}_3$ ) of **25a**

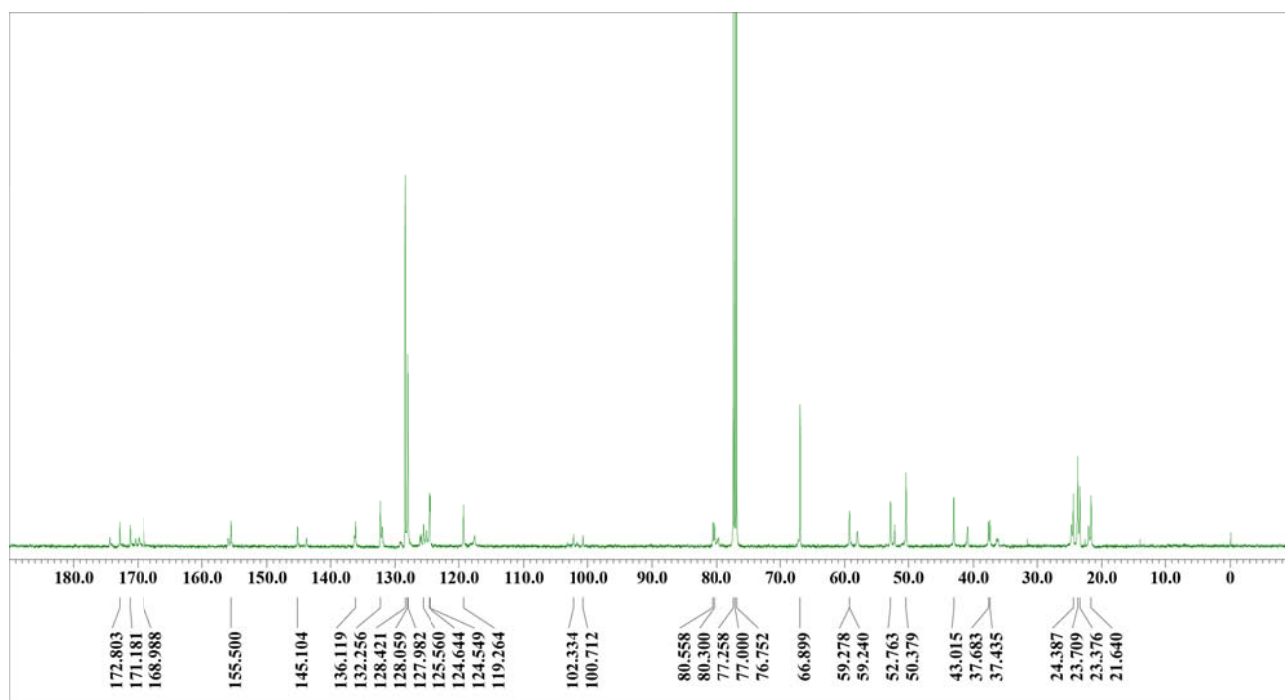

$^{19}\text{F}$  NMR (470 MHz,  $\text{CDCl}_3$ ) of **25a**

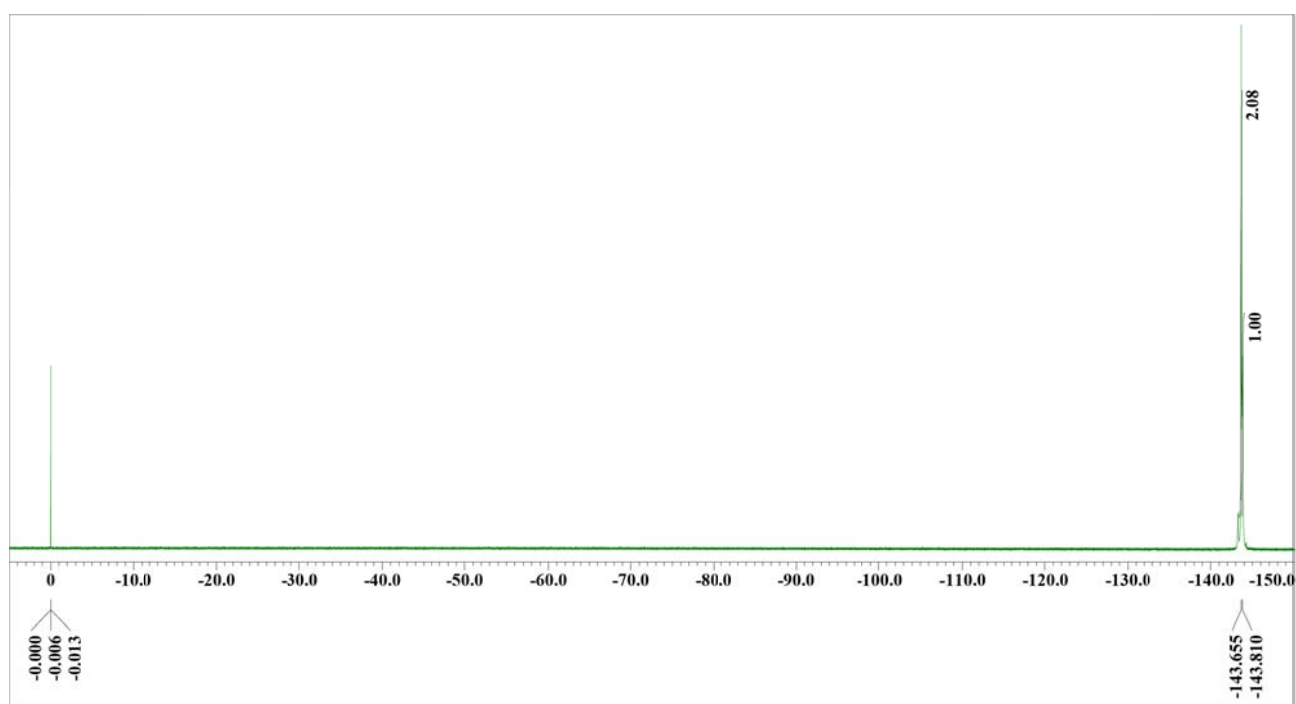

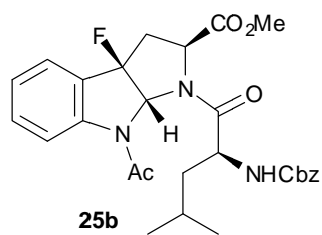

$^1\text{H}$  NMR (500 MHz,  $\text{CDCl}_3$ ) of **25b**

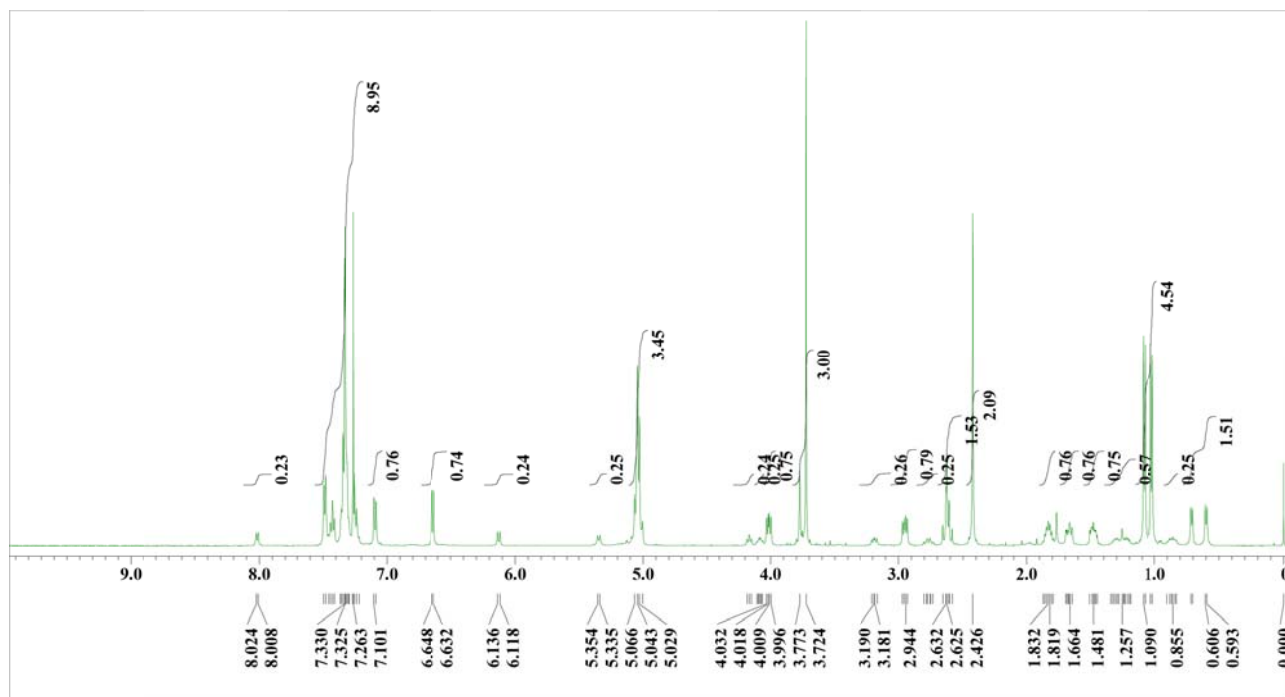

$^{13}\text{C}$  NMR (126 MHz,  $\text{CDCl}_3$ ) of **25b**

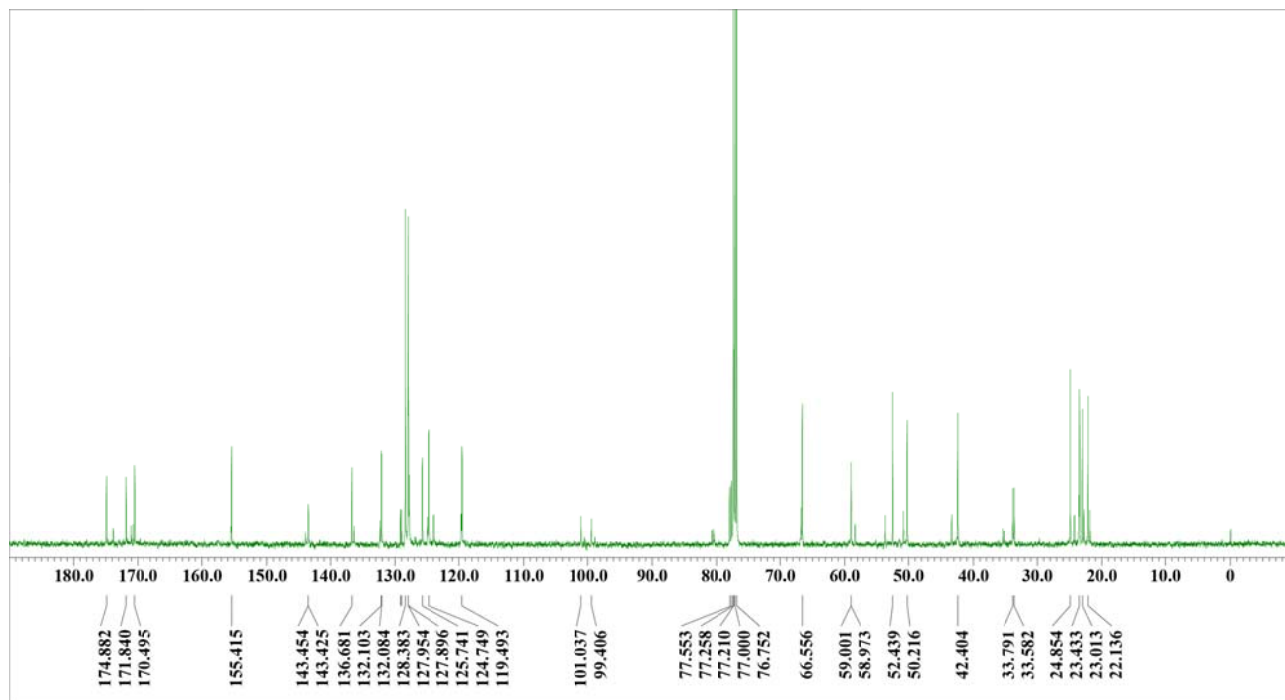

$^{19}\text{F}$  NMR (470 MHz,  $\text{CDCl}_3$ ) of **25b**

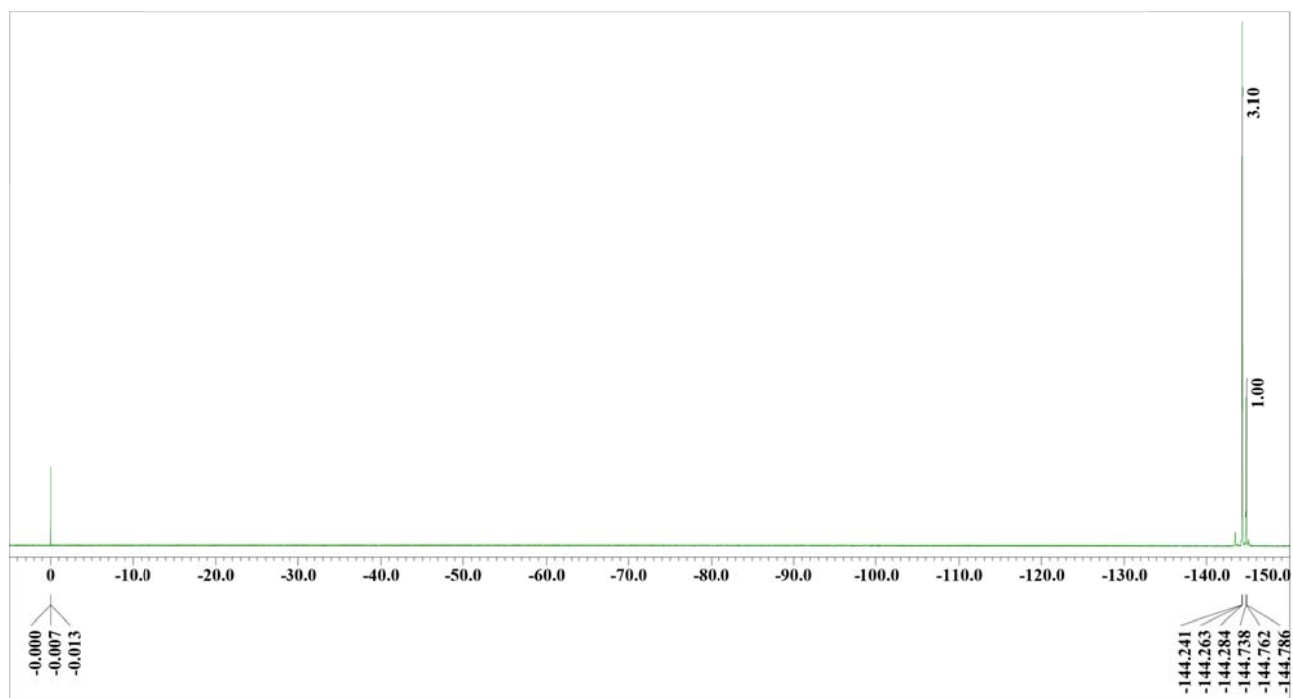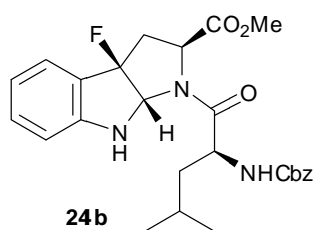

$^1\text{H}$  NMR (500 MHz,  $\text{CDCl}_3$ ) of **24b**

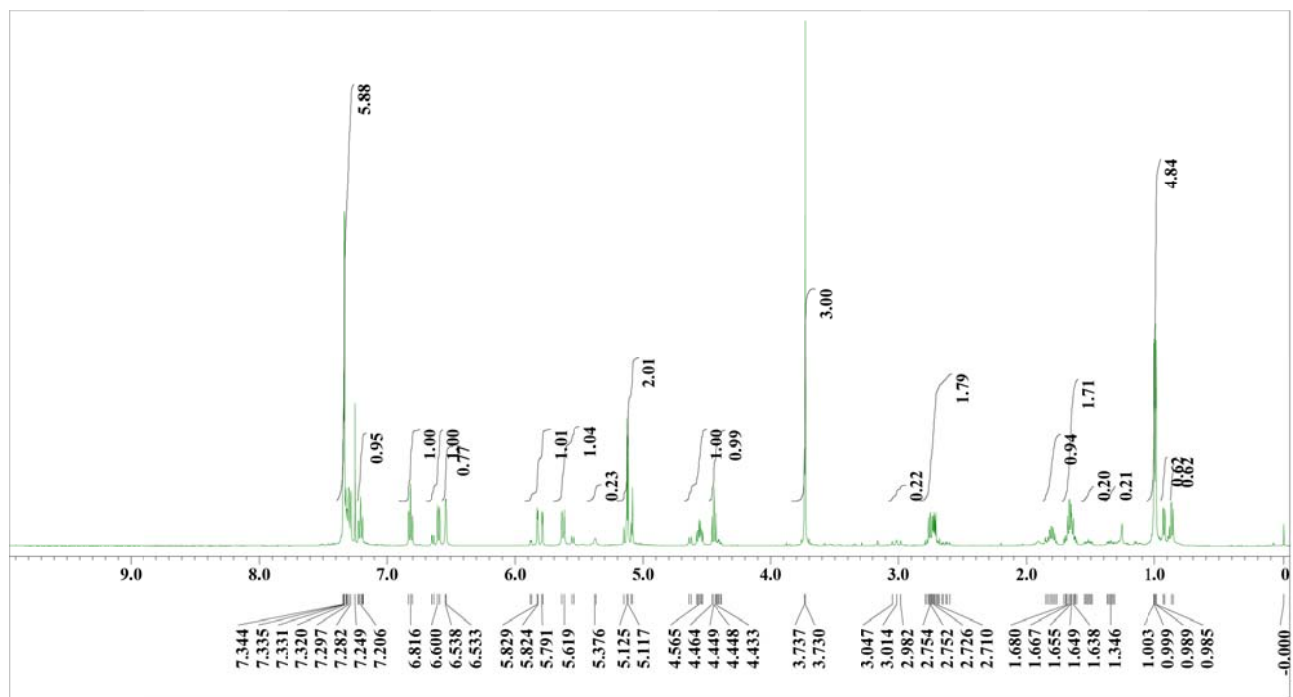

$^{13}\text{C}$  NMR (126 MHz,  $\text{CDCl}_3$ ) of **24b**

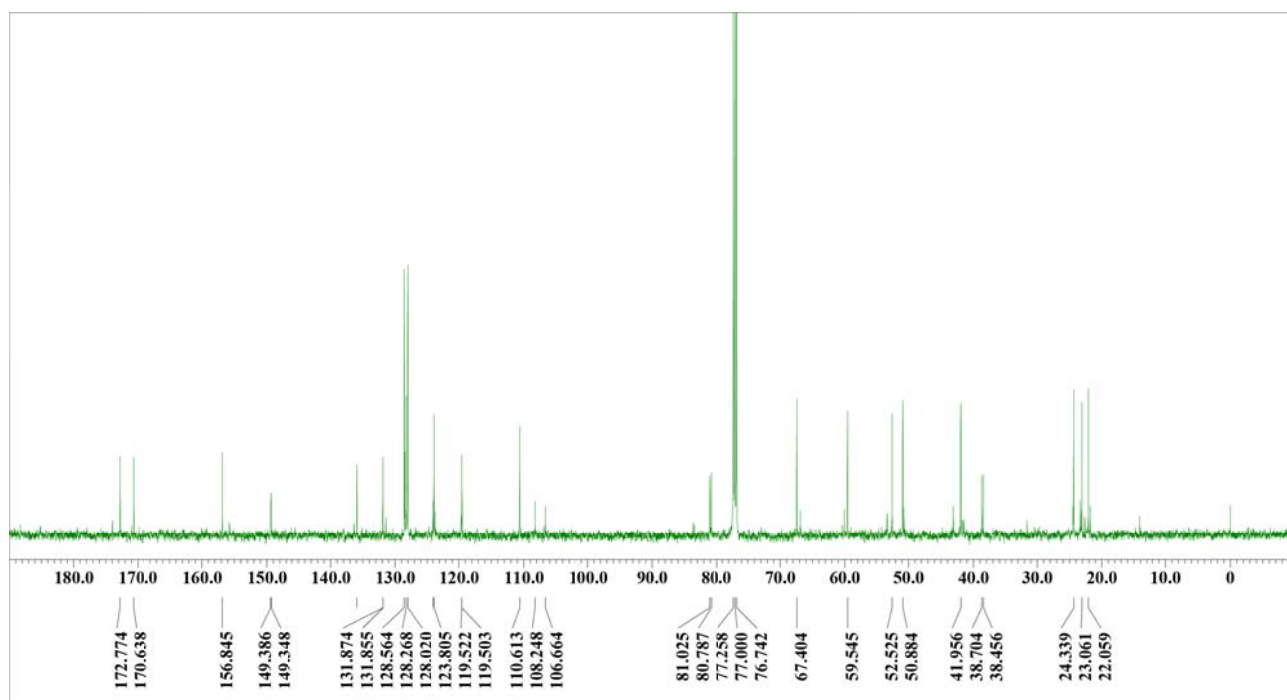

$^{19}\text{F}$  NMR (470 MHz,  $\text{CDCl}_3$ ) of **24b**

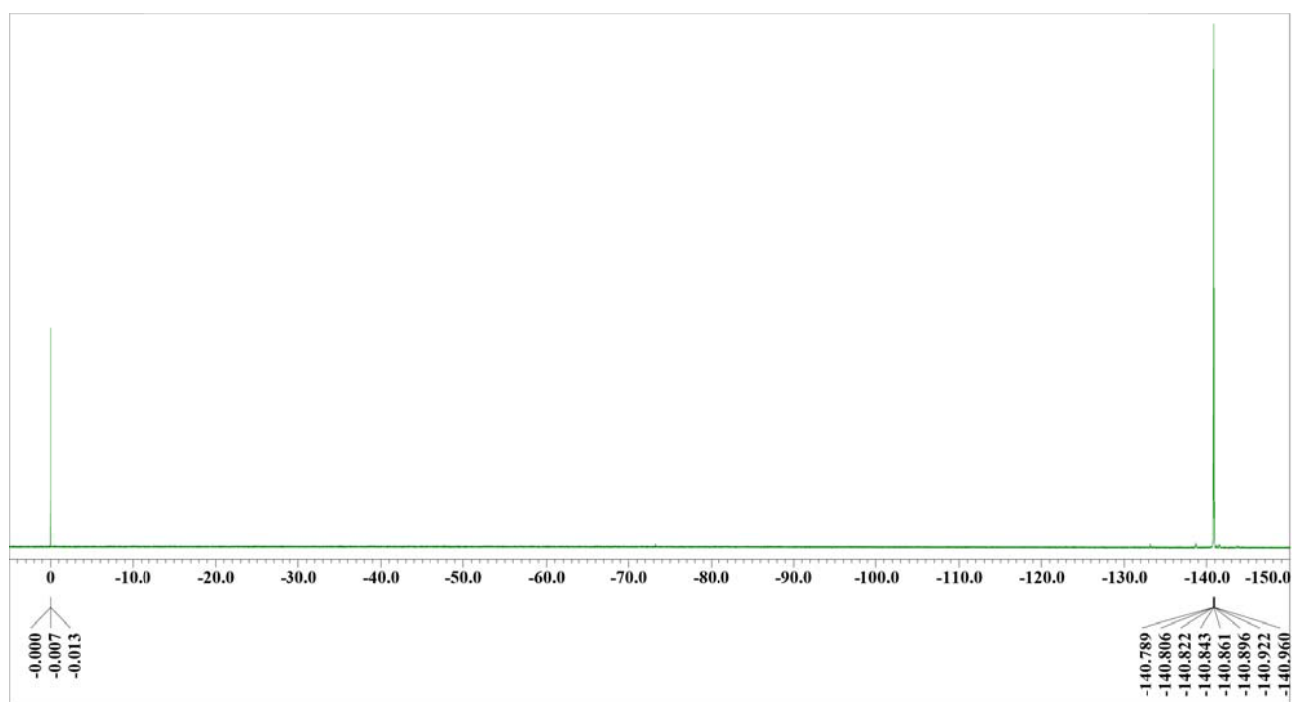

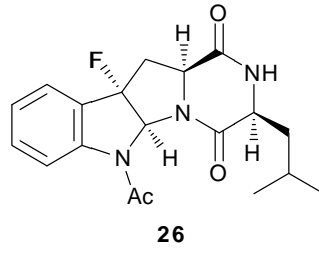

<sup>1</sup>H NMR (500 MHz, CDCl<sub>3</sub>) of **26**

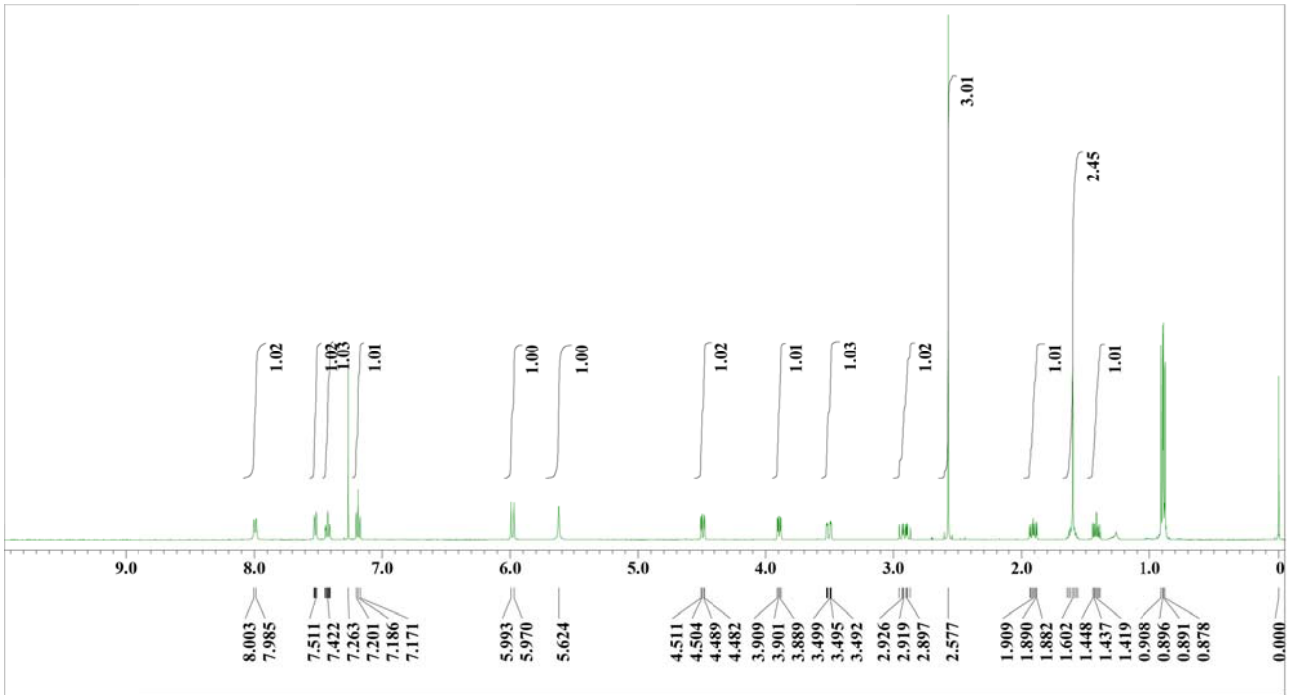

<sup>13</sup>C NMR (126 MHz, CDCl<sub>3</sub>) of **26**

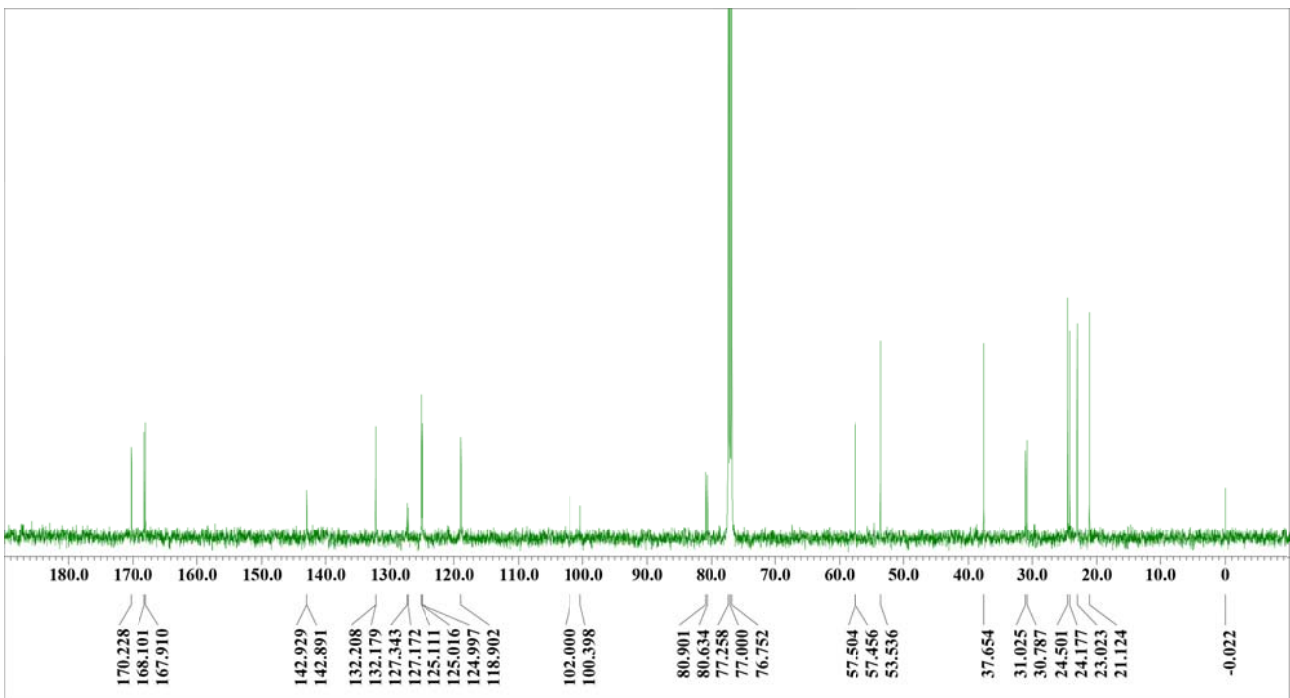



$^{19}\text{F}$  NMR (470 MHz,  $\text{CDCl}_3$ ) of **26**

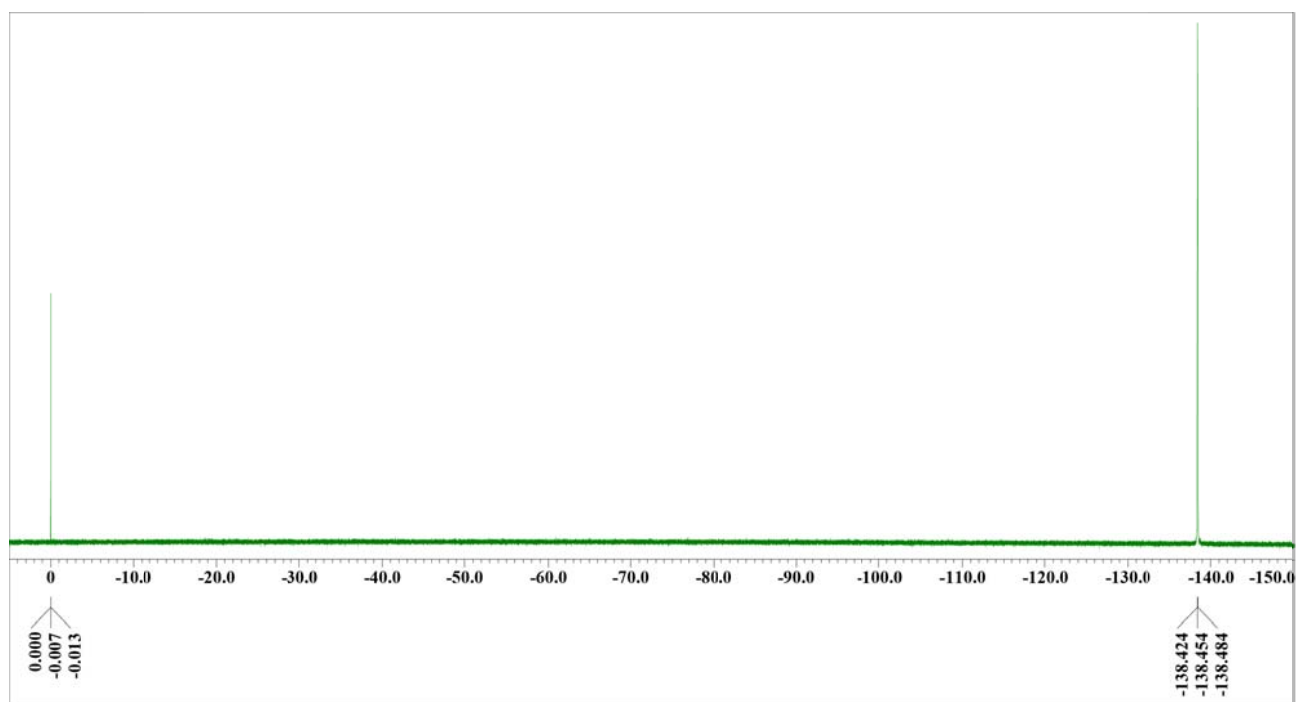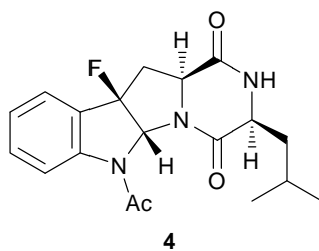

$^1\text{H}$  NMR (500 MHz,  $\text{CDCl}_3$ ) of **4**

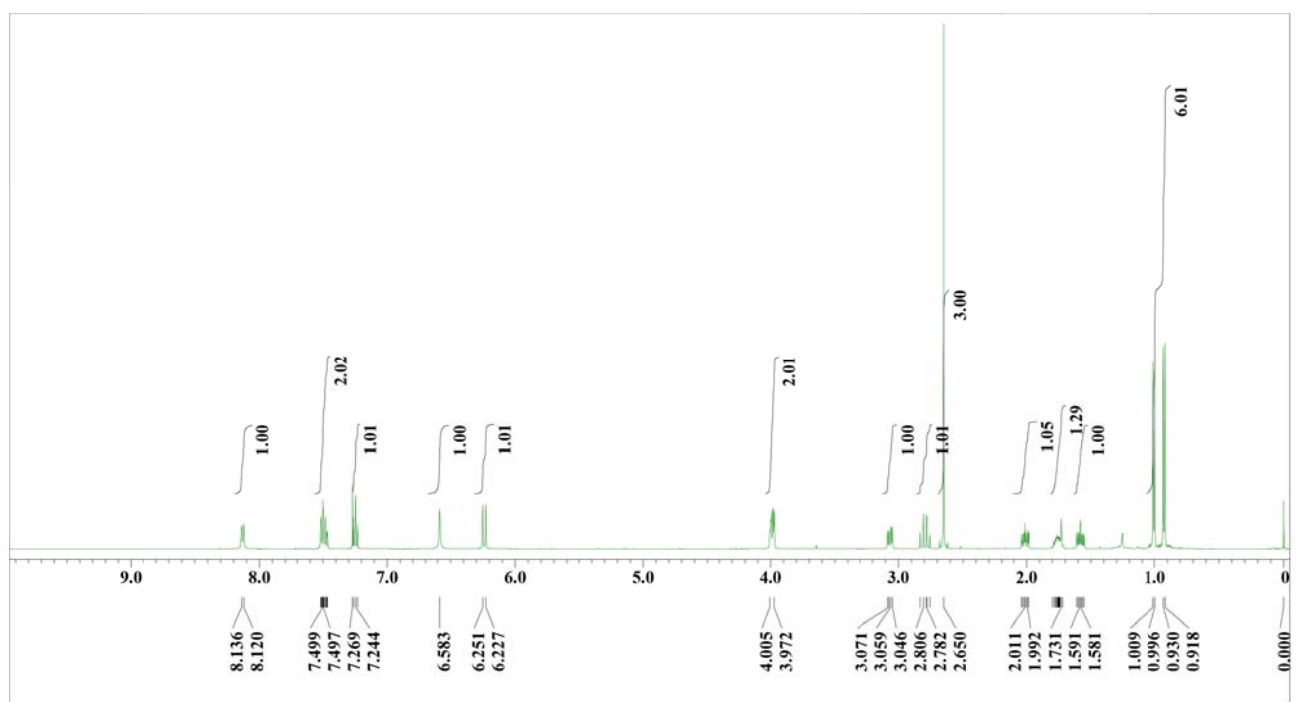

$^{13}\text{C}$  NMR (126 MHz,  $\text{CDCl}_3$ ) of **4**

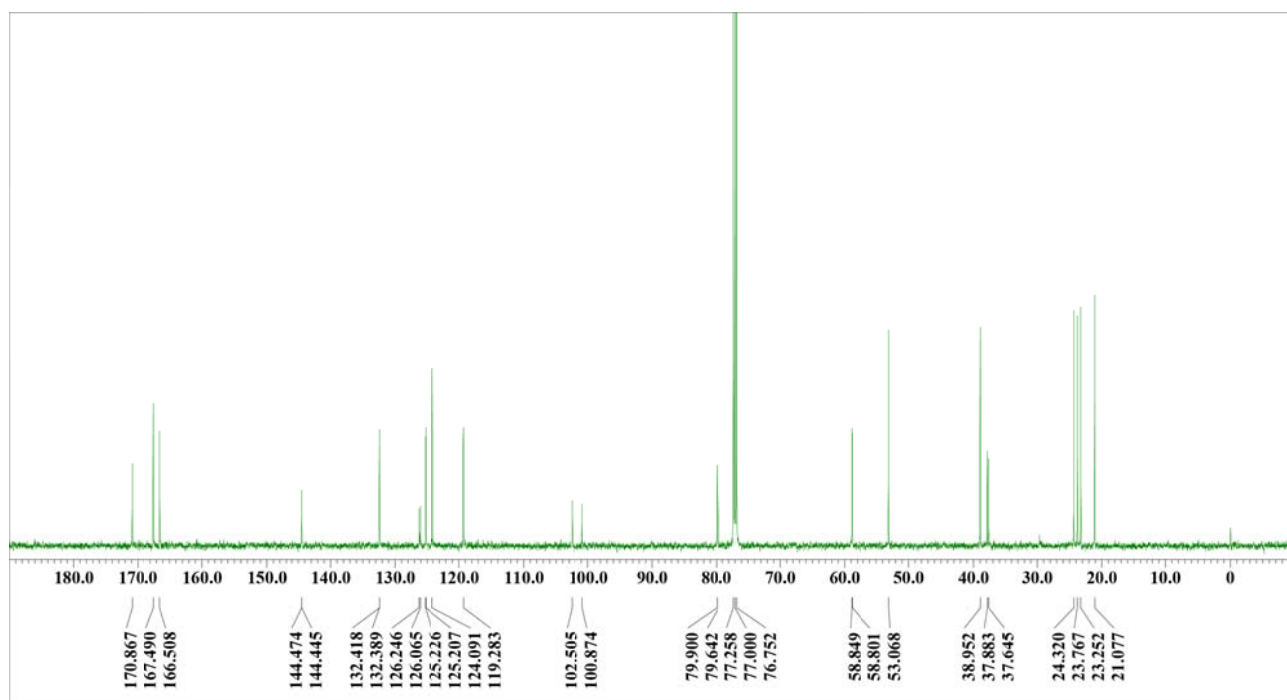

$^{19}\text{F}$  NMR (470 MHz,  $\text{CDCl}_3$ ) of **4**

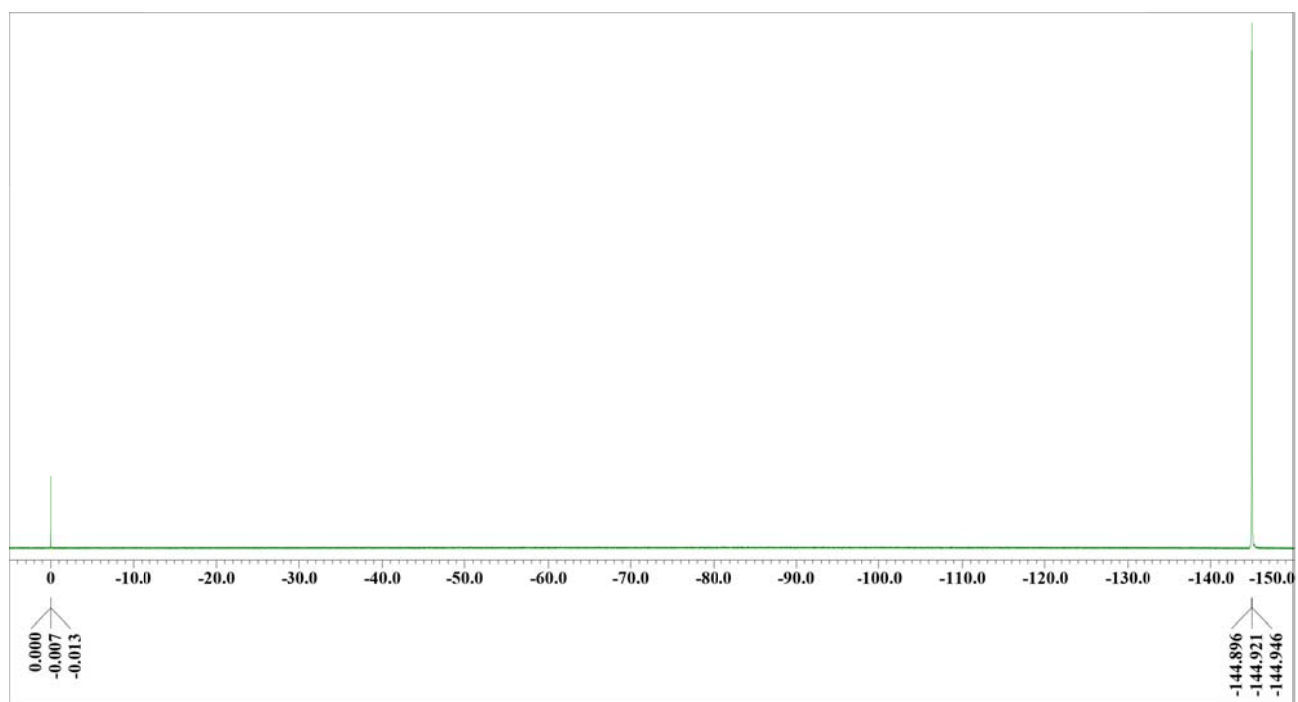

Supplement: c4ra08741k1.pdf [file c4ra08741k1.pdf]
